1 **Nosocomial *Pseudomonas aeruginosa* regulates alginate biosynthesis and Type VI secretion**  
2 **system during adaptive and convergent evolution for coinfection in critically ill COVID-19**  
3 **patients**

4 Jiuxin Qu<sup>1\*</sup>, Zhao Cai<sup>2\*</sup>, Xiangke Duan<sup>2</sup>, Han Zhang<sup>2</sup>, Shuhong Han<sup>2</sup>, Kaiwei Yu<sup>2</sup>, Zhaofang  
5 Jiang<sup>1</sup>, Yingdan Zhang<sup>2</sup>, Yang Liu<sup>3</sup>, Yingxia Liu<sup>1,4</sup>, Lei Liu<sup>1,4#</sup>, Liang Yang<sup>2,5#</sup>

6 1 Department of Clinical Laboratory, Shenzhen Third People's Hospital, Second Hospital  
7 Affiliated to Southern University of Science and Technology, National Clinical Research Center  
8 for Infectious Diseases, 518000, Shenzhen, Guangdong, China

9 2 School of Medicine, Southern University of Science and Technology, Shenzhen, 518055,  
10 China

11 3 Medical Research Center, Southern University of Science and Technology Hospital, 518055,  
12 Shenzhen, China

13 4 Shenzhen Key Laboratory of Pathogen and Immunity, State Key Discipline of Infectious  
14 Disease, Shenzhen Third People's Hospital, Second Hospital Affiliated to Southern University of  
15 Science and Technology, Shenzhen 518112, China

16 5. Shenzhen Key Laboratory for Gene regulation and Systems Biology, Southern University of  
17 Science and Technology, Shenzhen, 518055, China

18 \* These authors contributed equally to this work

19 # These authors contributed equally to this work and share the corresponding authorship

20 Corresponding authors: Lei Liu (Liulei3322@aliyun.com) and Liang Yang  
21 (yangl@sustech.edu.cn)

22 **Running title:** *Pseudomonas aeruginosa* evolution in COVID-19 patients

## 23 **Abstract**

24 COVID-19 pandemic has caused millions of death globally and caused huge impact on the health  
25 of infected patients. Shift in the lung microbial ecology upon such viral infection often worsens  
26 the disease and increases host susceptibility to secondary infections. Recent studies have  
27 indicated that bacterial coinfection is an unignorable factor contributing to the aggravation of  
28 COVID-19 and posing great challenge to clinical treatments. However, there is still a lack of in-  
29 depth investigation on the coinfecting bacteria in COVID-19 patients for better treatment of  
30 bacterial coinfection. With the knowledge that *Pseudomonas aeruginosa* is one of the top  
31 coinfecting pathogens, we analyzed the adaptation and convergent evolution of nosocomial *P.*  
32 *aeruginosa* isolated from two critical COVID-19 patients in this study. We sequenced and  
33 compared the genomes and transcriptomes of *P. aeruginosa* isolates longitudinally and parallelly  
34 for its evolutionary traits. *P. aeruginosa* overexpressed alginate and attenuated Type VI secretion  
35 system (T6SS) during coinfection for excessive biofilm formation and suppressed virulence.  
36 Results of bacterial competition assay and macrophage cytotoxicity test indicated that *P.*  
37 *aeruginosa* reduced its virulence towards both prokaryotic competitors and eukaryotic host  
38 through inhibiting its T6SS during evolution. *P. aeruginosa* T6SS is thus one of the reasons for its  
39 advantage to cause coinfection in COVID-19 patients while the attenuation of T6SS could cause  
40 a shift in the microecological composition in the lung. Our study will contribute to the  
41 development of therapeutic measures and the discovery of novel drug target to eliminate *P.*  
42 *aeruginosa* coinfection in COVID-19 patient.

43

44

## 45 **Introduction**

46 Coronavirus Disease 2019 (COVID-19) induced by Severe Acute Respiratory Syndrome  
47 Coronavirus 2 (SARS-CoV-2) has caused over 2.8 million death globally as reported by WHO at  
48 Apr 2021. SARS-CoV-2 induces cytokine storm and hyperinflammation resulting in respiratory  
49 dysfunction and necrosis of epithelial cells of the lungs [1, 2]. Such histological changes in the  
50 lung tissues may result in dysbiosis of lung microbiome and give rise to secondary bacterial  
51 infection in COVID-19 patients [3]. Several groups of researchers have emphasized that  
52 microbial coinfection indeed occurs in COVID-19 patients, especially in severe cases,  
53 exacerbates disease progress and makes difficulties to clinical treatments [4-7].

54 Nosocomial bacterial pathogens are risk factors contributing to such microbial coinfections and  
55 resulting in increased death of critically ill COVID-19 patients [8, 9]. Bacterial coinfection in  
56 COVID-19 patients is a serious problem which should not be neglected. The common  
57 coinfecting bacteria reported include *Mycoplasma pneumoniae*, *Staphylococcus aureus*, *Klebsiella*  
58 *spp.*, *Acinetobacter baumannii*, *Haemophilus influenzae*, *Pseudomonas aeruginosa* and etc [10,  
59 11]. There was bacteremia case caused by *Pseudomonas* reported [12]. *P. aeruginosa* is  
60 identified as a top coinfecting bacteria in our hospital (unpublished data).

61 *Pseudomonas aeruginosa* is a well-known nosocomial pathogen causing fatal chronic infections  
62 in immunocompromised patients with diseases like cystic fibrosis, catheter-associated infections  
63 and burn wounds [13, 14]. This bacterium induces infections through different mechanisms,  
64 including biofilm formation, quorum sensing systems and secretion of virulence factors [13]. *P.*  
65 *aeruginosa* possesses diverse virulence systems including quorum sensing systems, protein  
66 secretion systems, lipopolysaccharides etc for competition in the polymicrobial environments

67 and invasion to host cells[13]. Longitudinal analysis of convergent evolution of *P. aeruginosa*  
68 clinical isolates indicated that remodeling of virulence secretion is essential for host adaptation  
69 [15, 16]. Mutations in genes, *muca*, *vgrG*, *lasR*, *rpoN* and *pvdS*, significantly impair quorum  
70 sensing systems, protein secretion systems and virulence factor biosynthesis allowing *P.*  
71 *aeruginosa* to escape from host immune clearance in patients with lung diseases such as cystic  
72 fibrosis and ventilator-associated pneumonia [15-18]. Among the secretion systems, Type VI  
73 secretion system (T6SS) highly correlates to bacterial competition and host interaction of *P.*  
74 *aeruginosa* with other organisms [19]. Analysis of these evolutionary traits could contribute to  
75 the development of therapeutic measures to treat infections caused by *P. aeruginosa*. However,  
76 there is still a paucity of data on the insight of nosocomial *P. aeruginosa* coinfection with SARS-  
77 CoV-2 virus and its evolution during coinfection. To address this, we sequenced and compared  
78 the genomes and transcriptomes of four *P. aeruginosa* isolates sampled longitudinally from two  
79 critically ill COVID-19 patients to investigate its adaptive convergent evolution. The isolates  
80 collected from different patients are of the same sequence typing indicating the occurrence of  
81 hospital-acquired *P. aeruginosa* infection. The results showed that these isolates form excessive  
82 biofilm by developing mucoid phenotype through increasing alginate biosynthesis for long-term  
83 colonization in the host. More notably, we demonstrated here that *P. aeruginosa* evolves and  
84 attenuates its T6SS, especially HSI-II T6SS, to suppress its virulence to escape host clearance  
85 during coinfection. Understanding such adaptive convergent evolution could contribute to the  
86 treatment decision and the discovery of novel drug target to eliminate *P. aeruginosa* infection in  
87 COVID-19 patients.

## 88 **Material and Methods**

### 89 **Isolate collection, bacterial strains and growth media**

90 Four isolates of *Pseudomonas aeruginosa* were collected at two different time points  
91 longitudinally from sputum samples or bronchioalveolar lavage fluids (BALF) of two critically  
92 ill COVID-19 patients respectively during routine clinical tests. Isolates collected from patient 1  
93 were named as LYSZa2 and LYSZa3 while isolates collected from patient 2 were named as  
94 LYSZa5 and LYSZa6. Luria-Bertani (LB) broth and ABTGC medium supplemented with 10%  
95 Tryptic Soy Broth (TSB) were used for growing cultures. ABTGC medium consists of 0.1%  
96 MgCl<sub>2</sub>, 0.1% CaCl<sub>2</sub>, 0.1% FeCl<sub>3</sub>, 0.2% glucose, 0.2% casamino acids and 10% A10 medium  
97 which is made of 15.1mM (NH<sub>4</sub>)<sub>2</sub>SO<sub>4</sub>, 33.7mM Na<sub>2</sub>HPO<sub>4</sub>•2H<sub>2</sub>O, 22 mM KH<sub>2</sub>PO<sub>4</sub> and 0.05mM  
98 NaCl.

### 99 **Ethical statement**

100 This work does not include any direct participation of the patients and does not contain any  
101 identifiable human data. This work is approved by the Ethics Committee of Shenzhen Third  
102 People's Hospital, Second Hospital Affiliated to Southern University of Science and Technology  
103 [2020-184] and filed with the Ethics Committee of Southern University of Science and  
104 Technology [20200069].

### 105 **Antimicrobial susceptibility tests**

106 Antimicrobial susceptibility of the isolates to various antibiotics, including ceftazidime,  
107 piperacillin, cefoperazone/sulbactam, imipenem, aztreonam, and levofloxacin, were performed  
108 using the Kirby-Bauer disc-diffusion method. Diameters of inhibition zone was measured using a  
109 vernier caliper. Susceptibility was determined according to CLSI 2019[20]. Results of antibiotic  
110 susceptibility tests were listed in Table S1.

### 111 **Biofilm formation assay**

112 The isolates were cultured in LB broth at 37°C for overnight. The overnight cultures were diluted  
113 to OD<sub>600nm</sub> 0.01 in fresh LB broth. 100µL of the diluted cultures were loaded into 96-well plate  
114 in triplicates and incubated for 24h at 37°C statically allowing the formation of biofilm. After  
115 removing spent media, biofilms were washed carefully with ddH<sub>2</sub>O for two times. Biofilms were  
116 then stained by 125 µL of 0.1% crystal violet (CV) with 15 min incubation at room temperature.  
117 CV stain in the wells was discarded while stained biofilms were washed twice thoroughly with  
118 ddH<sub>2</sub>O and air-dried. Biofilms were then dissolved into 125 µL of 30% acetic acid and quantified  
119 relatively by measuring OD<sub>550nm</sub> values on a Tecan infinity pro200 microplate reader.

#### 120 **Genome extraction and sequencing**

121 The isolates were cultured in LB broth at 37°C to early stationary phase. For Illumina  
122 sequencing, genomic DNA of each isolates was extracted using AxyPerp Bacterial Genomic  
123 DNA Miniprep Kit (Corning, New York, USA) following manufacturer's protocol. PCR-free  
124 libraries were constructed using VAHTSTM PCR-Free DNA Library Prep Kit for Illumina®  
125 (Vazyme, China) following standard protocol. VAHTSTM DNA Adapters for Illumina®  
126 (Vazyme, China) was used to tag adaptor to purified fragments. Quality of the libraries were  
127 assessed by Agilent Technologies 2100 Bioanalyzer and qPCR. Paired-end DNA sequencing was  
128 then performed on Illumina HiSeq X platform with read length of 150 bp. For PacBio  
129 sequencing, genomes of LYSZa2 and LYSZa5 were extracted using Mabio Bacterial DNA  
130 Extraction Mini Kits (Mabio) according to manufacturer's protocol. DNA fragmentation was  
131 done using G-tubes (Covaris). SMRTbell DNA template libraries were prepared according to the  
132 manufacturer's specification (PacBio, Menlo Park, USA). DNA sequencing was then performed  
133 on Pacific Biosciences RSII sequencer (PacBio, Menlo Park, USA).

#### 134 **Transcriptome extraction and sequencing**

135 The isolates were cultured in triplicates in LB broth at 37°C to early stationary phase. Magen  
136 HiPure Universal RNA Mini kits (MCBio, China) was used to extract total RNA following the  
137 manufacturer's protocol. Extracted RNA was quantified using Qubit 2.0 (Thermo Fisher  
138 Scientific, MA, USA) and Nanodrop One (Thermo Fisher Scientific, MA, USA). Quality of  
139 RNA samples was assessed by Agilent 2100 system (Agilent Technologies, Waldbron,  
140 Germany). RNA libraries were constructed according to standard protocol using NEB Next®  
141 Ultra™ Directional RNA Library Prep Kit for Illumina® (New England Biolabs, MA, USA).  
142 Ribosomal RNA depletion was carried out using Ribo-zero rRNA Removal Kit. cDNA was  
143 synthesized using NEB Next First Strand Synthesis Reaction Buffer. Paired-end RNA  
144 sequencing was performed on Illumina NovaSeq 6000 platform with read length of 150 bp.

#### 145 **Sequencing data analysis**

146 Genomic Illumina sequencing reads were assembled into contigs using De Novo Assembly  
147 module of CLC Genomics Workbench 20 (Qiagen) with default parameters. Single nucleotide  
148 polymorphism was detected using 'Resequencing' module of CLC Genomics Workbench 20  
149 based on frequency of more than 80% using *P.aeruginosa* PAO1 genome as reference. PacBio  
150 sequencing reads were assembled into draft genome using HGAP4 pipeline of SMRT Link  
151 software v9.0 with default settings. Rearrangements of draft genomes were checked using Mauve  
152 software v.2.4.0 by PROGRESSIVEMAUVE alignment mode[21]. Multilocus sequence typing  
153 (MLST) was performed using MLST service available on the Center of Genomic of  
154 Epidemiology (CGE) webserver[22]. Identification of antimicrobial resistance genes was  
155 performed using ResFinder service on CGE webserver based on 85% of identity and 60% of  
156 minimal length[23]. Phylogenetic tree was constructed using Parsnp under libMUSCLE alignment  
157 mode using draft genomes of the isolates and other strains [24]. Genomic islands on LYSZa2 and

158 LYSZa5 genomes were predicted using IslandViewer 4 webservice [25]. Circular plot was  
159 constructed using BLAST Ring Image Generator [26]. Genomic loci were visualized using  
160 Easyfig package[27]. Gene names on the genomic loci were obtained from Pseudomonas  
161 Genome Database[28]. Prediction of protein functions of the genes were performed using NCBI  
162 Prokaryotic Genome Annotation Pipeline (PGAP) [29].

163 RNA sequences were pre-processes, mapped to *P. aeruginosa* PAO1 reference genome and  
164 analyzed using RNA analysis module of CLC Genomics Workbench 20 (Qiagen) with default  
165 parameters. Total read counts of each sample were normalized and compared using DESeq2 R  
166 package. Differentially expressed genes (DEGs) were selected based on absolute fold change  $\geq 4$ ,  
167 adjusted p-value  $< 0.05$  and base mean  $\geq 20$  [30]. GO enrichment analysis of DEGs was  
168 performed on DAVID bioinformatics database v6.8 [31]. PCoA plot and heatmap were drawn  
169 using Vegan, ggplot2, and pheatmap packages in R 4.0.0.

## 170 **Bacterial competition assay**

171 Competition between *P. aeruginosa* and *Escherichia coli* was carried out following the steps  
172 described previously by Hachani.et.al[32]. Briefly, the isolates were cultured overnight at 37°C  
173 on LB agar plates. *E. coli/pLacZ* strain was grown on LB agar plates containing 40 mg/mL of 5-  
174 bromo-4-chloro-indolyl- $\beta$ -D-galactopyranoside (X-gal) at 37°C for overnight and appeared blue  
175 in colour. Single colony of each strain was subcultured in TSB medium and grown under  
176 agitation for overnight. Appropriate volume of each overnight culture was taken to make final  
177 OD<sub>600nm</sub> =1 and centrifuged to collect cells. Cell pellets were resuspended in 100  $\mu$ L TSB  
178 medium while 10  $\mu$ L of each suspension was spotted and incubated on LB agar plate for 5 hours  
179 at 37°C. 30  $\mu$ L of cell suspension of each *P. aeruginosa* strain was taken and mixed gently with  
180 30  $\mu$ L of *E. coli* cell suspensions. 20  $\mu$ L of mixed cell cultures were spotted onto LB agar plate



181 and incubated for 5 hours at 37°C. Each bacterial spot was scraped from LB agar plates and  
182 resuspended in 1mL of TSB medium. Resuspensions of bacterial spots were diluted to 10<sup>-3</sup>  
183 serially in 10-fold dilutions. These serial cell dilutions were then spotted in triplicates onto LB  
184 agar plates containing 40 mg/mL X-gal and incubated for 8 hours for killing *E. coli*. 100 µL of  
185 10<sup>-3</sup> dilution of each mixed bacterial spot were plated onto LB agar plates containing 40 mg/mL  
186 X-gal for CFU counting of *E. coli* for quantitating killing effect.

### 187 **Cytotoxicity assay**

188 The cytotoxicity of the isolates was assayed by using murine RAW 264.7 macrophages. RAW  
189 macrophages were grown in 24-well plates in Dulbecco modified Eagle medium (DMEM),  
190 GlutaMAX, sodium pyruvate, and phenol red supplemented with 10% FBS. Prior to infection,  
191 confluent RAW cells were washed twice with sterile PBS and incubated in DMEM medium.  
192 Log-phase cultures were washed with sterile PBS twice, and resuspended in DMEM medium  
193 devoid of FBS. Macrophage cells were infected with the isolates respectively at a Multiplicity of  
194 Infection (MOI) of 20 at 37 °C in 5% CO<sub>2</sub> incubator. After 3 h infection, the culture supernatants  
195 were collected for detecting lactate dehydrogenase (LDH) activities. The LDH activities were  
196 detected by using commercially LDH cytotoxicity kit (YAESSEN Bio) according to standard  
197 procedure.

### 198 **Data Availability**

199 All Illumina sequencing data used in this study could be found from BioProject No.  
200 PRJNA706783 and assembled genomes of *P. aeruginosa* LYSZa2 and *P. aeruginosa* LYSZa5  
201 could be found from BioProject No. PRJNA712958 and PRJNA712961 on NCBI.

### 202 **Results**

## 203 **Hospital-acquired *P. aeruginosa* in the respiratory systems of COVID-19 patients**

204 During routine screening of respiratory samples of COVID-19 patients, we discovered that two  
205 patients were colonized by *P. aeruginosa* with the same ST type. We have identified and isolated  
206 *P. aeruginosa* from 5 different critically ill patients in total. To investigate genetic adaptation and  
207 epidemiological link between these *P. aeruginosa* isolates, genomes of all isolates were  
208 sequenced by Illumina HiSeq platform. Multi-Locus Sequence Typing (MLST) analysis indicated  
209 that four isolates collected from 2 patients are of the same type, *P. aeruginosa* ST1074, showing  
210 that these *P. aeruginosa* isolated from these two patients were hospital-acquired. We thus focused  
211 on these isolates to analyze their competitive advantage during colonization in COVID-19  
212 environment. These four *P. aeruginosa* isolates were collected from respiratory samples of the  
213 two patients and named as LYSZa2, LYSZa3, LYSZa5 and LYSZa6 respectively. Among which,  
214 LYSZa2 and LYSZa3 were isolated from patient 1 with 3 days interval while LYSZa2 was  
215 isolated on day 12 of hospitalization. LYSZa5 and LYSZa6 were isolated from patient 2 with 15  
216 days interval while LYSZa5 was isolated on day 17 of hospitalization. Genomes of the first  
217 isolate of each patient, LYSZa2 and LYSZa5, were further sequenced using Pacific Biosciences  
218 RSII sequencer for further analysis. We defined LYSZa2 and LYSZa5 as the ancestry isolates  
219 while LYSZa3 and LYSZa6 as the progeny isolates, and analyzed their general genomic  
220 characteristics.

## 221 **Characterization of LYSZa2 and LYSZa5 genomes, phylogeny and antibiotic resistance**

222 Circular genomes of LYSZa2 and LYSZa5 were assembled with genome sizes of 6 638 980 bp  
223 and 6 638 990 bp, with 66.2% of GC respectively. Rearrangements were checked and manually  
224 curated after pairwise comparison of the two genomes. As predicted by PGAP, LYSZa2 genome  
225 contains 6183 genes among which 6046 features encode for proteins and 86 encode for RNAs,

226 while LYSZa5 genome contains 6183 genes among which 6045 features encode for proteins and  
227 86 encodes for RNAs.

228 Both of the genomes contain the same antimicrobial resistance genes predicted by ResFinder,  
229 including *crpP*, *aph(3')-IIb*, *catB7*, *blaOXA-50*, *blaPAO*, and *fosA* against Fluoroquinolone,  
230 Aminoglycoside, Phenicol, Beta-lactam and Fosfomycin drugs. No difference in antimicrobial  
231 genes was identified between the ancestry and the progeny isolates. *In vitro* antimicrobial  
232 resistance of the isolates were tested using antibiotics including ceftazidime, piperacillin,  
233 cefoperazone/sulbactam, imipenem, aztreonam and levofloxacin. Obvious differences in  
234 resistance were observed between the ancestry and the progeny isolates. LYSZa5 is sensitive to  
235 imipenem, aztreonam and levofloxacin. However, LYSZa6 becomes resistance to imipenem,  
236 aztreonam and intermediate to levofloxacin after 15 days of evolution (Table S1). No obvious  
237 change in resistance to these drugs was observed between LYSZa2 and LYSZa3 probably due to  
238 the short evolving time (Table S1).

239 Genomic islands (GIs) on LYSZa2 and LYSZa5 genomes were predicted by IslandViewer4  
240 (Table S2&S3). In total, 35 GIs on LYSZa2 and 36 GIs on LYSZa5 were predicted by at least  
241 one prediction method. Genomes of LYSZa2 and LYSZa5 were compared with genomes of five  
242 other *P. aeruginosa* strains including PAO1 reference strain and virulence strains including  
243 PA14, LESB58, SCV20265 and VFRPA04 (Figure 1A). Most of the GIs predicted are specific to  
244 LYSZa2 and LYSZa5 genomes (Figure 1A). Genes in these GIs are involved in transcriptional  
245 regulation, DNA restriction-modification, DNA repair, toxin-antitoxin and secretion systems,  
246 showing that these GIs are essential for *P. aeruginosa* survival and virulence during coinfection  
247 with SARS-CoV-2.

248 We then traced the origin of these isolates by constructing phylogenetic tree using genomes of

249 LYSZa2 and LYSZa5 with 22 other clinical or environmental *P. aeruginosa* genomes selected  
250 from NCBI/Pseudomonas genome database (Table S4) and one SARS-CoV-2 coinfecting strain  
251 published by our group recently, *P. aeruginosa* LYSZa7[33]. As seen from the phylogenetic tree  
252 (Figure 1B), LYSZa2 and LYSZa5 are closed related without evolutionary distance between  
253 them, and are in the same phylogenetic cluster with PAO1 reference strain and the hypervirulent  
254 isolate LESB58 from CF patient. Interestingly, great evolutionary distance was observed  
255 between these two isolates with *P. aeruginosa* LYSZa7, indicating the distinct evolutionary traits  
256 evolved between different *P. aeruginosa* strains in COVID-19 patients for adaptation.

257 Single nucleotide polymorphism (SNP) and other genome modifying events were assessed  
258 between the ancestry isolates and the progeny isolates respectively using PAO1 as reference  
259 (Table S5). 90 genomic modifying events including SNPs, insertion, deletion and replacement  
260 (Table S5) were identified in LYSZa3 with a dN/dS ratio of 0.875, indicating a negative selection  
261 during evolution, probably due to the short evolving time between these two isolates. 93 of such  
262 genomic modifying events (Table S5) were identified in LYSZa6 comparing to LYSZa5 with a  
263 dN/dS ratio of 1.114 indicating a positive selection. Common mutations were found between  
264 LYSZa3 and LYSZa6 on genes related to Type VI secretion system and iron transport (Table 1).  
265 Such observation indicated that *P. aeruginosa* undergoes both adaptive evolution and convergent  
266 evolution in COVID-19 patients to survive and modulate its virulence during coinfection. We  
267 then performed RNA sequencing to assess the changes at transcriptional level during evolution.

### 268 **Alginate overproduction and attenuated expression of T6SS during evolution**

269 To discover the transcriptional changes during adaptive evolution, we performed RNA  
270 sequencing of the isolates on Illumina HiSeq platform and analyzed differential gene expression  
271 between the ancestry isolates and the progeny isolates longitudinally. Moreover, we also

272 compared the gene expression in parallel between the progeny cells from the two patients to  
273 learn the convergent changes of *P. aeruginosa* in different hosts. Based on the filtering criteria of  
274 fold change  $\geq 4$ , adjusted p-value  $< 0.05$  and base mean  $\geq 20$ , the expression of 129 genes were  
275 differentially regulated in LYSZa3 comparing to LYSZa2, among which 75 were upregulated and  
276 others were downregulated (Table S6). In LYSZa6 as comparing to LYSZa5, 242 genes were  
277 differentially expressed, among which 114 were upregulated and others were downregulated  
278 (Table S7). These differentially expressed genes are illustrated by heatmaps (Figure 2A&B),  
279 which display distinctive transcriptomic profiles of the progeny isolates comparing to the  
280 ancestry isolates. We further clustered the isolates using Principal Coordinates Analysis (PCoA)  
281 based on Bray Curtis dissimilarity to check the differences between isolates. As seen from PCoA  
282 plots (Figure 2C&D), LYSZa2 group and LYSZa5 group separated clearly from LYSZa3 group  
283 and LYSZa6 group respectively, indicating the ancestry isolates and the progeny isolates  
284 possessing distinct physiology.

285 We then performed Gene Ontology (GO) enrichment analysis using the differentially expressed  
286 genes (DEGs) to identify highly enriched functions in the progeny isolates comparing to the  
287 ancestry isolates (Figure 3). 11 GO consisting of 7 biological processes, 3 molecular functions  
288 and 1 cellular component were enriched in LYSZa3 comparing to LYSZa2 (Figure 3A). Whereas  
289 in LYSZa6 comparing to LYSZa5, 13 GO consisting of 7 biological processes, 5 molecular  
290 functions and 1 cellular component were highly enriched (Figure 3C). Among all of these  
291 enriched functions in both the progeny isolates, most significantly enriched biological processes  
292 are alginic acid biosynthetic process and protein secretion by the type VI secretion system  
293 (T6SS). 12 genes assigned to alginic acid biosynthetic process (*algD*, *algX*, *algA*, *algE*, *algF*,  
294 *algL*, *alg44*, *algJ*, *algK*, *alg8*, *algI*, *algG*) were all upregulated in LYSZa3 for 16.89 to 1091.52

295 folds (Table 2). The expression of same genes also increased significantly in LYSZa6 for 4.45 to  
296 138.79 folds (Table 3). Eight genes assigned to protein secretion by T6SS, PA1657 (*hsiB2*),  
297 PA1658 (*hsiC2*), PA1659 (*hsiF2*), PA1660(*hsiG2*), PA1661(*hsiH2*), PA1662(*clpV2*),  
298 PA1663(*sfa2*), PA1666(*lip2*), were all significantly downregulated in LYSZa3 for 4.46 to 6.47  
299 folds (Table 2). In LYSZa6, beside the same eight genes mentioned above, 7 other genes  
300 assigned to protein secretion by T6SS were also downregulated, including PA1656 (*hsiA2*),  
301 PA1665 (*fha2*), PA1667 (*hsiJ2*), PA1668 (*dotU2*), PA1669 (*icmF2*), *stk1* and *stp1*, for 4.46 to  
302 17.11 folds (Table 3). Besides these genes assigned to T6SS by GO enrichment analysis, the  
303 expression of several other genes involved in T6SS, *hcpB*, *lip3* (PA2364), and *dotU3* (PA2362),  
304 were also decreased in LYSZa3 (Table 2). While the expression of 15 other genes involved in  
305 T6SS significantly decreased in LYSZa6, including *clpV1*, PA3904(PAAR4), PA2702(*tse2*),  
306 PA2774(*tse4*), PA2775(*tsi4*), *vgrG1*, PA0093(*tse6*), PA3905(*tecT*), PA0082(*tssA1*), PA2703(*tsi2*),  
307 PA0094(*eagT6*), PA3484(*tse3*), PA5266(*vgrG6*), *hcpA* and *hcpB* (Table 3). *P. aeruginosa* carries  
308 three types of T6SS, HSI-I, HSI-II and HSI-III respectively. As illustrated in Figure 4, the  
309 downregulated genes in both progeny isolates, especially those in LYSZa6, are mostly involved  
310 in HSI-II gene cluster, with several others scattered on another two gene clusters. Higher no. of  
311 DEGs observed in LYSZa6 comparing to LYSZa3 may consequently due to the longer evolving  
312 time of LYSZa6 in the host. The changes in the gene abundance assigned to different GO  
313 functions are illustrated in Figure 3B&D. There was dramatic increase in the gene abundance for  
314 alginic acid biosynthetic process and significant decrease in the gene abundance for protein  
315 secretion by T6SS in the progeny isolates. Such observation conveyed excessive biosynthesis of  
316 alginate and suppression of T6SS in the progeny isolates during colonization. The progeny  
317 isolates produce excessive alginate and exhibit more mucoid phenotype which matches with the

318 DEG results (Figure 5A). As alginate plays an important role in biofilm architecture and  
319 development[34], we thus quantified biofilm formation of the isolates by crystal violet staining.  
320 As seen from Figure 5B, aligned with gene expression, an increase in the biofilm formation were  
321 observed in LYSZa3 comparing to those of LYSZa2. Similarly, more biofilm formation was  
322 observed in LYSZa6 as compared to LYSZa5. RNA-seq analysis showed the adaptive changes in  
323 genes responsible for alginate biosynthesis and T6SS protein secretion in the progeny isolates.

324 In addition, 74 common genes in total were found to be differentially regulated in both progeny  
325 isolates, LYSZa3 and LYSZa6 (Table S8), indicating convergent gene regulation of these two  
326 isolates during colonization in different patients. Similar to the results observed from adaptive  
327 changes, most of the common genes with specific functions are involved in alginate biosynthesis  
328 and T6SS, which are the convergent changes in *P. aeruginosa* in different hosts during  
329 coinfection with SARS-CoV-2 virus. More genes were differentially regulated in LYSZa6 than  
330 LYSZa3 probably due to the longer evolving time between LYSZa5 and LYSZa6. We observed  
331 increased alginate production and elevated biofilm formation of the progeny isolates from the  
332 phenotypic assays. T6SS is used as a weapon by *P. aeruginosa* to compete with neighboring  
333 bacteria cells and to combat with the host cells in order to gain surviving advantage in the  
334 polymicrobial environment in the respiratory system. Suppression in T6SS would result in  
335 reduction in its advantage to outcompete other bacteria and its virulence to escape from host  
336 immune clearance. We thus performed bacterial competition test and cytotoxicity assay of the  
337 isolates to confirm the changes in the anti-prokaryotic and anti-eukaryotic capability between the  
338 ancestry isolates and the progeny isolates.

### 339 **Decrease in bactericidal activity of *P. aeruginosa* due to suppression of T6SS**

340 To test the reduction in the competitiveness of the progeny isolates with bacterial neighbors due

341 to suppression of T6SS, we examined the capability of the isolates in killing *E. coli* cells through  
342 bacterial competition assay. The isolates were mixed and cultured with *E. coli/placZ* in 1:1 ratio  
343 respectively. The mixtures were diluted to  $10^{-3}$  while triplicate colonies of each dilution were  
344 then cultured on plate containing X-gal to test the killing efficiency (Figure 6A&B). *E.*  
345 *coli/pLacZ* digested X-gal and appeared as blue colonies. Survival of *E. coli* was determined  
346 both qualitatively by visualizing the intensity of blue pigment of the colonies and quantitatively  
347 by counting the blue *E. coli* CFUs left. As observed from Figure 6A&B, almost no trace of blue  
348 pigment could be observed from the mixture of the ancestry isolates, LYSZa2 and LYSZa5, with  
349 *E. coli*. More intensive blue colonies were observed from the mixed cultures of the progeny  
350 isolates, LYSZa3 and LYSZa6, with *E. coli*, indicating disadvantage of these isolates to  
351 outcompete *E. coli* comparing to their respective ancestry isolates. Same trend was also observed  
352 from quantitative tests illustrated in Figure 6C where higher numbers of *E. coli* CFU were  
353 obtained after coculturing with LYSZa3 and LYSZa6 comparing with those culturing with  
354 LYSZa2 and LYSZa5 respectively. Such results indicated a decrease in the bactericidal activity  
355 of the progeny isolates during bacterial competition consequently due to the inhibition of T6SS.

### 356 **Weakened macrophage cytotoxicity of *P. aeruginosa* after T6SS suppression**

357 We then performed macrophage killing assay to assess the decrease in cytotoxicity of the  
358 progeny isolates to eukaryotic cells upon T6SS suppression. Cultures of the isolates were added  
359 to infect macrophages individually. Relative lactate dehydrogenase (LDH) release was measured  
360 to determine the death of macrophages. More macrophages are killed, higher LDH will be  
361 released. As illustrated in Figure 7, LDH released by macrophages infected by LYSZa3 was  
362 much lower than that of LYSZa2. Similar results were observed from LYSZa5 and LYSZa6  
363 where macrophages infected by LYSZa5 released a significant higher level of LDH comparing to



364 LYSZa6. LYSZa3 and LYSZa6 possess weaker cytotoxicity comparing to their ancestral isolates.  
365 Such results suggested that these *P. aeruginosa* isolates produced attenuated virulence towards  
366 their eukaryotic hosts due to the downregulation of T6SS genes after evolution.

## 367 **Discussion**

368 Upon the urgent need to prevent the spread of SARS-CoV-2 and equip people against the virus,  
369 clinical doctors and researchers put their attention on investigating the pathogenicity and  
370 epidemiology of the virus, and developing treatment measures and vaccines to combat it.  
371 However, the increased occurrence of illness and death due to bacterial coinfection and its  
372 complications indicated that there is a much underestimated and neglected influence of bacterial  
373 coinfection on the disease progression in COVID-19 patients. Here in this study, we isolated the  
374 ancestry and the progeny isolate pairs of hospital-acquired *P. aeruginosa* from two critically ill  
375 COVID-19 patients to investigate its adaptive and convergent evolution during coinfection with  
376 SARS-CoV-2 virus. We found that *P. aeruginosa* upregulates its alginate biosynthesis and  
377 downregulates its T6SS to increase its fitness in the niche and reduce its virulence to escape from  
378 host clearance for longer colonization. To the best of our knowledge, this is the first study  
379 describing the evolution of *P. aeruginosa* during coinfection with SARS-CoV-2 virus in COVID-  
380 19 patients.

381 The isolates collected from the two patients belongs to the same sequence type. In addition, the  
382 ancestry isolates appeared after more than 10 days of hospitalization, they are therefore hospital-  
383 acquired *P. aeruginosa* strain. Genomic sequencing analysis revealed that the genomes of the  
384 isolates carry specific GIs for DNA repair and protein secretion systems, and ARGs for multiple  
385 drug classes. Common genomic modification events identified between the progeny isolates and

386 the ancestral isolates indicated the genomic changes in genes related to T6SS, *tla3* and *tli5b3*.  
387 However, no change was observed in these two genes at transcriptional level most probably due  
388 to the short evolving time and the complexity of gene regulation cascades. Although the  
389 expression of these two genes were not affected, we indeed observed lots of significant changes  
390 at transcriptional level.

391 Through differential gene expression analysis, we found that genes involved in alginate  
392 biosynthesis were upregulated greatly while genes involved in T6SS protein secretion system  
393 were significantly downregulated. Alginate is an essential EPS component converting non-  
394 mucoid *P. aeruginosa* to mucoid phenotype, and is important for biofilm structure and  
395 antimicrobial resistance [34]. Clinical *P. aeruginosa* strains overproducing alginate isolated from  
396 CF patients enhanced biofilm formation and interfered with host immune responses leading to  
397 the aggravation of disease conditions and poor prognosis [35, 36]. Moreover, excessive  
398 biosynthesis of alginate in *P. aeruginosa* promotes its coinfection with other pathogens such as *S.*  
399 *aureus* and *B. cenocepacia* and increases their persistence in CF infections [37, 38].  
400 Overproduction of alginate and increased biofilm formation were observed in the progeny strains  
401 in this study, inferring the potential mechanism adopted by *P. aeruginosa* in COVID-19 patients  
402 to interfere with host defense systems. Thick alginate layer is also probably a key contributing  
403 factor to the increase in the antimicrobial resistance of the progeny isolate observed. Excessive  
404 alginate may also facilitate coexistence of *P. aeruginosa* and other coinfecting pathogens in  
405 COVID-19 for secondary bacterial infection. Further analysis is needed for deeper investigation  
406 on the role of alginate in the microbial community in COVID-19 patients.

407 A more notable observation in this study is the attenuation of T6SS in the progeny isolates. The  
408 expression of genes involved in T6SS protein secretion were significantly downregulated in both

409 the progeny isolates. *P. aeruginosa* T6SS functions as a phage-like toxin delivery apparatus to  
410 transport toxic effectors into surrounding competing bacterial cells and also host cells to gain  
411 survival advantages and invade host cells [39]. *P. aeruginosa* carries three types of T6SS, being  
412 HSI-I, HSI-II, and HSI-III respectively. HSI-I is dedicated to inter-bacterial competition while  
413 HSI-II and HSI-III, which are less studied, associate with both anti-prokaryotic and anti-  
414 eukaryotic functions [40, 41]. Three gene clusters HSI-I, HSI-II and HSI-III contain *hcp*, *clpV*,  
415 *vgrG*, *tss/his* genes and other genes including *ppkA*, *pppA*, *tag*, *sfa*, *fha*, *lip*, *dotU*, *icmF*, *stp* and  
416 *stk* genes for the full function of T6SS apparatus (Figure 4)[39, 42]. In both the progeny isolates,  
417 especially in LYSZa6, the expression of most of HSI-II genes and associated genes were  
418 downregulated significantly (Figure 4). Such results indicated a general inhibition of HSI-II  
419 T6SS in the *P. aeruginosa* isolates during convergent evolution in the patients to adapt to  
420 COVID-19 environment. As HSI-II T6SS associates with anti-bacterial and anti-host functions,  
421 we tested both the bacterial killing capacity and macrophage cytotoxicity of the isolates. The  
422 results confirmed the decrease in the virulence to both neighbouring bacteria and host cells of the  
423 progeny isolates due to reduction in T6SS expression. Previous studies had demonstrated that *P.*  
424 *aeruginosa* abrogated its T6SS to adapt to the host environment by genetic modification on  
425 genes such as *vgrG* and *vgrG4* during chronic infection of cystic fibrosis [16, 43]. Here we  
426 showed that *P. aeruginosa* attenuated its T6SS at transcriptional level to gain fitness and survival  
427 advantages during acute infection of COVID-19 pneumonia. Moreover, attenuation of T6SS in *P.*  
428 *aeruginosa* may give opportunities to other bacterial pathogens to outcompete itself and making  
429 host cells susceptible to subsequent infections. A recent research showed that *P. aeruginosa*  
430 abrogating its T6SS could be outcompeted by coinfecting *B.cenocepacia* in CF patients in an  
431 age- and T6SS-dependent manner and predisposing host to superinfection of *B.cenocepacia* [44].

432 *P. aeruginosa* attenuating its T6SS in COVID-19 patients could probably play a pivotal role in  
433 coexisting with other pathogenic strains in the polymicrobial environment and promoting  
434 subsequent infection in COVID-19 patients. Further study is indeed needed to make a deeper  
435 investigation on the role of *P. aeruginosa* played in SARS-CoV-2 infected environment. In this  
436 study, we demonstrated that *P. aeruginosa* adapted to SARS-CoV-2 infected environment by  
437 adaptive and convergent evolution in alginate biosynthesis and T6SS gene expression for  
438 enhancing biofilm formation, increasing antimicrobial resistance and gaining fitness for survival  
439 and colonization during the acute COVID-19 infection. This study will contribute to the  
440 understanding of adaptation and convergent evolution of *P. aeruginosa* which in turn helps in the  
441 precise treatment decision and novel drug target discovery to eliminate *P. aeruginosa* coinfection  
442 in COVID-19 patients.

#### 443 **Acknowledgements**

444 This work was supported by Guangdong Natural Science Foundation for Distinguished Young  
445 Scholar[2020B1515020003] and Start-up Grants [Y01416106 and Y01416206] from the  
446 Southern University of Science and Technology (SUSTech) to Dr. Liang Yang, Science and  
447 Technology Program of Shenzhen [JCYJ20190809144005609] and Guangdong Basic and  
448 Applied Basic Research Foundation [2020A1515010586] to Dr. Jiuxin Qu, and Grant from Bill  
449 & Melinda Gates Foundation to Dr. Lei Liu. The authors declare that they have no competing  
450 interests.

#### 451 **References**

- 452 1. Veras, F.P., et al., *SARS-CoV-2-triggered neutrophil extracellular traps mediate COVID-19 pathology*. *J Exp*  
453 *Med*, 2020. **217**(12).
- 454 2. Mehta, P., et al., *COVID-19: consider cytokine storm syndromes and immunosuppression*. *Lancet*, 2020.  
455 **395**(10229): p. 1033-1034.
- 456 3. Hanada, S., et al., *Respiratory Viral Infection-Induced Microbiome Alterations and Secondary Bacterial*

- 457 *Pneumonia*. *Frontiers in Immunology*, 2018. **9**.
- 458 4. Rawson, T.M., et al., *Bacterial and Fungal Coinfection in Individuals With Coronavirus: A Rapid Review To*  
459 *Support COVID-19 Antimicrobial Prescribing*. *Clin Infect Dis*, 2020. **71**(9): p. 2459-2468.
- 460 5. Wang, L., et al., *Coronavirus disease 2019 in elderly patients: Characteristics and prognostic factors based*  
461 *on 4-week follow-up*. *Journal of Infection*, 2020. **80**(6): p. 639-645.
- 462 6. Goyal, P., J.J. Choi, and M.M. Safford, *Clinical Characteristics of Covid-19 in New York City*. *New England*  
463 *Journal of Medicine*, 2020. **382**(24): p. 2372-2374.
- 464 7. Cox, M.J., et al., *Co-infections: potentially lethal and unexplored in COVID-19*. *Lancet Microbe*, 2020. **1**(1):  
465 p. e11.
- 466 8. Sharifipour, E., et al., *Evaluation of bacterial co-infections of the respiratory tract in COVID-19 patients*  
467 *admitted to ICU*. *BMC Infect Dis*, 2020. **20**(1): p. 646.
- 468 9. Zhang, G., et al., *Clinical features and short-term outcomes of 221 patients with COVID-19 in Wuhan,*  
469 *China*. *J Clin Virol*, 2020. **127**: p. 104364.
- 470 10. Shen, C., et al., *Treatment of 5 Critically Ill Patients With COVID-19 With Convalescent Plasma*. *JAMA*, 2020.
- 471 11. Lansbury, L., et al., *Co-infections in people with COVID-19: a systematic review and meta-analysis*. *Journal*  
472 *of Infection*, 2020. **81**(2): p. 266-275.
- 473 12. Arentz, M., et al., *Characteristics and Outcomes of 21 Critically Ill Patients With COVID-19 in Washington*  
474 *State*. *JAMA*, 2020. **323**(16): p. 1612-1614.
- 475 13. Gellatly, S.L. and R.E.W. Hancock, *Pseudomonas aeruginosa: new insights into pathogenesis and host*  
476 *defenses*. *Pathogens and Disease*, 2013. **67**(3): p. 159-173.
- 477 14. Cole, S.J., et al., *Catheter-Associated Urinary Tract Infection by Pseudomonas aeruginosa Is Mediated by*  
478 *Exopolysaccharide-Independent Biofilms*. *Infection and Immunity*, 2014. **82**(5): p. 2048-2058.
- 479 15. Wang, K., et al., *The rapid in vivo evolution of Pseudomonas aeruginosa in ventilator-associated*  
480 *pneumonia patients leads to attenuated virulence*. *Open Biology*, 2017. **7**(9).
- 481 16. Marvig, R.L., et al., *Convergent evolution and adaptation of Pseudomonas aeruginosa within patients with*  
482 *cystic fibrosis*. *Nature Genetics*, 2015. **47**(1): p. 57-+.
- 483 17. Smith, E.E., et al., *Genetic adaptation by Pseudomonas aeruginosa to the airways of cystic fibrosis*  
484 *patients*. *Proceedings of the National Academy of Sciences of the United States of America*, 2006. **103**(22):  
485 p. 8487-8492.
- 486 18. Yang, L., et al., *Evolutionary dynamics of bacteria in a human host environment*. *Proceedings of the*  
487 *National Academy of Sciences of the United States of America*, 2011. **108**(18): p. 7481-7486.
- 488 19. Wood, T.E., et al., *The Pseudomonas aeruginosa T6SS Delivers a Periplasmic Toxin that Disrupts Bacterial*  
489 *Cell Morphology*. *Cell Reports*, 2019. **29**(1): p. 187-+.
- 490 20. CLSI, *Performance Standards for Antimicrobial Susceptibility Testing. 29th ed.* CLSI supplement  
491 M100. Wayne, PA: Clinical and Laboratory Standards Institute, 2019.
- 492 21. Darling, A.E., B. Mau, and N.T. Perna, *progressiveMauve: multiple genome alignment with gene gain, loss*  
493 *and rearrangement*. *PLoS One*, 2010. **5**(6): p. e11147.
- 494 22. Larsen, M.V., et al., *Multilocus Sequence Typing of Total-Genome-Sequenced Bacteria*. *Journal of Clinical*  
495 *Microbiology*, 2012. **50**(4): p. 1355-1361.
- 496 23. Zankari, E., et al., *Identification of acquired antimicrobial resistance genes*. *Journal of Antimicrobial*  
497 *Chemotherapy*, 2012. **67**(11): p. 2640-2644.
- 498 24. Treangen, T.J., et al., *The Harvest suite for rapid core-genome alignment and visualization of thousands of*  
499 *intraspecific microbial genomes*. *Genome Biology*, 2014. **15**(11).
- 500 25. Bertelli, C., et al., *IslandViewer 4: expanded prediction of genomic islands for larger-scale datasets*. *Nucleic*  
501 *Acids Res*, 2017. **45**(W1): p. W30-W35.
- 502 26. Alikhan, N.F., et al., *BLAST Ring Image Generator (BRIG): simple prokaryote genome comparisons*. *Bmc*  
503 *Genomics*, 2011. **12**.
- 504 27. Sullivan, M.J., N.K. Petty, and S.A. Beatson, *Easyfig: a genome comparison visualizer*. *Bioinformatics*, 2011.  
505 **27**(7): p. 1009-10.
- 506 28. Winsor, G.L., et al., *Enhanced annotations and features for comparing thousands of Pseudomonas*  
507 *genomes in the Pseudomonas genome database*. *Nucleic Acids Res*, 2016. **44**(D1): p. D646-53.
- 508 29. Tatusova, T., et al., *NCBI prokaryotic genome annotation pipeline*. *Nucleic Acids Res*, 2016. **44**(14): p. 6614-  
509 24.

- 510 30. Love, M.I., W. Huber, and S. Anders, *Moderated estimation of fold change and dispersion for RNA-seq data*  
511 *with DESeq2*. Genome Biol, 2014. **15**(12): p. 550.
- 512 31. Huang, D.W., B.T. Sherman, and R.A. Lempicki, *Systematic and integrative analysis of large gene lists using*  
513 *DAVID bioinformatics resources*. Nature Protocols, 2009. **4**(1): p. 44-57.
- 514 32. Hachani, A., N.S. Lossi, and A. Filloux, *A visual assay to monitor T6SS-mediated bacterial competition*. J Vis  
515 Exp, 2013(73): p. e50103.
- 516 33. Qu, J., et al., *Persistent Bacterial Coinfection of a COVID-19 Patient Caused by a Genetically Adapted*  
517 *Pseudomonas aeruginosa Chronic Colonizer*. Front Cell Infect Microbiol, 2021. **11**: p. 641920.
- 518 34. Hentzer, M., et al., *Alginate overproduction affects Pseudomonas aeruginosa biofilm structure and*  
519 *function*. J Bacteriol, 2001. **183**(18): p. 5395-401.
- 520 35. Qiu, D., et al., *Regulated proteolysis controls mucoid conversion in Pseudomonas aeruginosa*. Proc Natl  
521 Acad Sci U S A, 2007. **104**(19): p. 8107-12.
- 522 36. Pedersen, S.S., et al., *Pseudomonas aeruginosa alginate in cystic fibrosis sputum and the inflammatory*  
523 *response*. Infect Immun, 1990. **58**(10): p. 3363-8.
- 524 37. Limoli, D.H., et al., *Pseudomonas aeruginosa Alginate Overproduction Promotes Coexistence with*  
525 *Staphylococcus aureus in a Model of Cystic Fibrosis Respiratory Infection*. mBio, 2017. **8**(2).
- 526 38. Chatteraj, S.S., et al., *Pseudomonas aeruginosa alginate promotes Burkholderia cenocepacia persistence in*  
527 *cystic fibrosis transmembrane conductance regulator knockout mice*. Infect Immun, 2010. **78**(3): p. 984-93.
- 528 39. Mougous, J.D., et al., *A virulence locus of Pseudomonas aeruginosa encodes a protein secretion apparatus*.  
529 Science, 2006. **312**(5779): p. 1526-30.
- 530 40. Allsopp, L.P., et al., *RsmA and AmrZ orchestrate the assembly of all three type VI secretion systems in*  
531 *Pseudomonas aeruginosa*. Proceedings of the National Academy of Sciences of the United States of  
532 America, 2017. **114**(29): p. 7707-7712.
- 533 41. Hachani, A., T.E. Wood, and A. Filloux, *Type VI secretion and anti-host effectors*. Curr Opin Microbiol, 2016.  
534 **29**: p. 81-93.
- 535 42. Ho, B.T., T.G. Dong, and J.J. Mekalanos, *A view to a kill: the bacterial type VI secretion system*. Cell Host  
536 Microbe, 2014. **15**(1): p. 9-21.
- 537 43. Kordes, A., et al., *Genetically diverse Pseudomonas aeruginosa populations display similar transcriptomic*  
538 *profiles in a cystic fibrosis explanted lung*. Nat Commun, 2019. **10**(1): p. 3397.
- 539 44. Perault, A.I., et al., *Host Adaptation Predisposes Pseudomonas aeruginosa to Type VI Secretion System-*  
540 *Mediated Predation by the Burkholderia cepacia Complex*. Cell Host Microbe, 2020. **28**(4): p. 534-547 e3.

## 541 Tables

| Gene          | Product                     | Type | LYSZa3 vs LYSZa2  |                                            |                | LYSZa6 vs LYSZa5 |                   |                                            |                |
|---------------|-----------------------------|------|-------------------|--------------------------------------------|----------------|------------------|-------------------|--------------------------------------------|----------------|
|               |                             |      | Amino acid change | Coding region change in longest transcript | Non-synonymous | Type             | Amino acid change | Coding region change in longest transcript | Non-synonymous |
| <b>PA0041</b> | hemagglutinin               | SNV  |                   | 5803C>T                                    | No             | SNV              |                   | 5803C>T                                    | No             |
| <b>PA0259</b> | Type 6 lipase adaptor, Tla3 | SNV  |                   | 333A>G                                     | No             | SNV              |                   | 333A>G                                     | No             |
|               |                             | MNV  |                   | 330_331de linsTT                           | No             | MNV              |                   | 330_331de linsTT                           | No             |
|               |                             | SNV  |                   | 327T>G                                     | No             | SNV              |                   | 327T>G                                     | No             |
|               |                             | SNV  |                   | 324T>A                                     | No             | SNV              |                   | 324T>A                                     | No             |

|                    |                               |                       |           |                       |                           |                       |           |                       |     |
|--------------------|-------------------------------|-----------------------|-----------|-----------------------|---------------------------|-----------------------|-----------|-----------------------|-----|
|                    |                               | MNV                   | Ser107Asn | 320_321de<br>linsAT   | Yes                       | MNV                   | Ser107Asn | 320_321de<br>linsAT   | Yes |
|                    |                               | SNV                   |           | 315T>C                | No                        | SNV                   |           | 315T>C                | No  |
|                    |                               | SNV                   | Asp105Asn | 313G>A                | Yes                       | SNV                   | Asp105Asn | 313G>A                | Yes |
|                    |                               | SNV                   |           | 303G>A                | No                        | SNV                   |           | 303G>A                | No  |
| <b><i>fjuA</i></b> | ferrichrome receptor FiuA     | SNV                   |           | 1854C>T               | No                        | SNV                   |           | 1854C>T               | No  |
|                    |                               | SNV                   |           | 1842G>C               | No                        | SNV                   |           | 1842G>C               | No  |
|                    |                               | SNV                   |           | 1830G>C               | No                        | SNV                   |           | 1830G>C               | No  |
|                    |                               | SNV                   | Ile608Met | 1824C>G               | Yes                       | SNV                   | Ile608Met | 1824C>G               | Yes |
|                    |                               | SNV                   | Ile608Leu | 1822A>C               | Yes                       | SNV                   | Ile608Leu | 1822A>C               | Yes |
|                    |                               | SNV                   |           | 1812G>A               | No                        | SNV                   |           | 1812G>A               | No  |
|                    |                               | SNV                   |           | 1800G>C               | No                        | SNV                   |           | 1800G>C               | No  |
|                    |                               | SNV                   |           | 1797G>A               | No                        | SNV                   |           | 1797G>A               | No  |
|                    |                               | SNV                   |           | 1794G>C               | No                        | SNV                   |           | 1794G>C               | No  |
|                    |                               | SNV                   |           | 1792C>T               | No                        | SNV                   |           | 1792C>T               | No  |
|                    |                               | Deletion              | Ser597fs  | 1790delC              | Yes                       | Deletion              | Ser597fs  | 1790delC              | Yes |
|                    |                               | SNV                   | Ser596Arg | 1788T>A               | Yes                       | SNV                   | Ser596Arg | 1788T>A               | Yes |
|                    |                               | Insertion             | Ser596fs  | 1786dupA              | Yes                       | Insertion             | Ser596fs  | 1786dupA              | Yes |
|                    |                               | SNV                   | Thr595Asn | 1784C>A               | Yes                       | SNV                   | Thr595Asn | 1784C>A               | Yes |
|                    |                               | MNV                   |           | 1780_1781<br>delinsTC | No                        | MNV                   |           | 1780_1781<br>delinsTC | No  |
|                    |                               | Insertion             | Asn593fs  | 1778_1779<br>insGG    | Yes                       | Insertion             | Asn593fs  | 1778_1779<br>insGG    | Yes |
| MNV                | Met592_Asn593delinsIleTyr     | 1776_1777<br>delinsAT | Yes       | MNV                   | Met592_Asn593delinsIleTyr | 1776_1777<br>delinsAT | Yes       |                       |     |
| Replacement        | Met592fs                      | 1773delinsCG          | Yes       | Replacement           | Met592fs                  | 1773delinsCG          | Yes       |                       |     |
| <b>PA45<br/>14</b> | iron transport outer membrane | SNV                   | Thr193Ile | 578C>T                | Yes                       | SNV                   | Thr193Ile | 578C>T                | Yes |
|                    |                               | Replacement           | Asp190fs  | 569_570de<br>linsG    | Yes                       | Replacement           | Asp190fs  | 569_570de<br>linsG    | Yes |

|               |                                                   |           |           |         |     |           |           |         |     |
|---------------|---------------------------------------------------|-----------|-----------|---------|-----|-----------|-----------|---------|-----|
|               | receptor                                          | SNV       | Gln189Leu | 566A>T  | Yes | SNV       | Gln189Leu | 566A>T  | Yes |
|               |                                                   | Insertion | Gln189fs  | 564dupG | Yes | Insertion | Gln189fs  | 564dupG | Yes |
| <b>PA5088</b> | type VI secretion lipase immunity protein, Tli5b3 | SNV       | Gly181Ser | 541G>A  | Yes | SNV       | Gly181Ser | 541G>A  | Yes |
|               |                                                   | SNV       |           | 528G>C  | No  | SNV       |           | 528G>C  | No  |

542 **Table 1.** Common genetic mutations identified between LYSZa3 and LYSZa6. Full list of  
543 genetic mutations is included in Table S5.

| Gene          | Product Name                                                                  | Base Mean | Fold Change | Adj.p-value | LYSZa2 Mean | LYSZa3 Mean |
|---------------|-------------------------------------------------------------------------------|-----------|-------------|-------------|-------------|-------------|
| <i>algD</i>   | GDP-mannose 6-dehydrogenase AlgD                                              | 27877.94  | 1091.52     | 0.00E+00    | 61.33       | 50065.00    |
| <i>algX</i>   | alginate biosynthesis protein AlgX                                            | 1967.25   | 256.42      | 2.31E-236   | 18.33       | 3478.67     |
| <i>algA</i>   | phosphomannose isomerase / guanosine 5'-diphospho-D-mannose pyrophosphorylase | 5853.40   | 238.02      | 0.00E+00    | 59.00       | 10382.00    |
| <i>algE</i>   | Alginate production outer membrane protein AlgE precursor                     | 2204.36   | 221.80      | 3.29E-252   | 24.00       | 3889.33     |
| <i>algF</i>   | alginate o-acetyltransferase AlgF                                             | 1648.75   | 211.59      | 3.00E-242   | 18.67       | 2924.00     |
| <i>algL</i>   | poly(beta-d-mannuronate) lyase precursor AlgL                                 | 2134.58   | 182.28      | 4.64E-245   | 28.00       | 3766.33     |
| <i>alg44</i>  | alginate biosynthesis protein Alg44                                           | 1855.41   | 162.63      | 1.64E-285   | 27.33       | 3260.33     |
| <i>algJ</i>   | alginate o-acetyltransferase AlgJ                                             | 1033.36   | 154.76      | 2.12E-191   | 16.00       | 1783.33     |
| <i>algK</i>   | alginate biosynthetic protein AlgK precursor                                  | 1171.78   | 145.20      | 2.18E-233   | 19.33       | 2043.00     |
| <i>alg8</i>   | alginate biosynthesis protein Alg8                                            | 2758.04   | 133.33      | 0.00E+00    | 49.67       | 4939.33     |
| <i>algI</i>   | alginate o-acetyltransferase AlgI                                             | 1457.21   | 59.29       | 1.83E-259   | 58.33       | 2501.67     |
| <i>algG</i>   | alginate-c5-mannuronan-epimerase AlgG                                         | 1682.20   | 16.89       | 1.73E-125   | 226.00      | 2793.33     |
| <i>hcpB</i>   | secreted protein Hcp                                                          | 107.95    | -4.46       | 1.17E-20    | 215.67      | 36.00       |
| <b>PA1663</b> | Sfa2                                                                          | 305.43    | -4.46       | 2.74E-47    | 603.33      | 100.00      |



|               |       |         |       |           |         |        |
|---------------|-------|---------|-------|-----------|---------|--------|
| <b>PA1666</b> | Lip2  | 159.33  | -4.50 | 2.97E-24  | 319.00  | 52.67  |
| <b>PA2362</b> | DotU3 | 22.49   | -4.54 | 4.95E-06  | 44.00   | 7.00   |
| <b>PA1660</b> | HsiG2 | 346.81  | -4.63 | 1.56E-59  | 686.67  | 110.33 |
| <b>PA1662</b> | clpV2 | 1014.01 | -4.63 | 3.41E-44  | 2020.67 | 318.00 |
| <b>PA1661</b> | HsiH2 | 246.25  | -4.65 | 1.19E-39  | 488.33  | 77.67  |
| <b>PA1659</b> | HsiF2 | 163.52  | -5.59 | 1.38E-34  | 334.00  | 43.00  |
| <b>PA1657</b> | HsiB2 | 842.21  | -6.21 | 6.69E-109 | 1743.67 | 204.33 |
| <b>PA1658</b> | HsiC2 | 1839.66 | -6.47 | 4.92E-141 | 3824.67 | 437.00 |
| <b>PA2364</b> | Lip3  | 32.22   | -9.20 | 6.01E-13  | 70.33   | 5.67   |

544 **Table 2.** Selected DEGs in LYSZa3 comparing to LYSZa2 related to alginate biosynthesis and  
545 Type VI secretion system. Filtering criteria are fold change  $\geq 4$ , adjusted p-value  $< 0.05$  and base  
546 mean  $\geq 20$ . Full list of DEGs is included in Table S6.

| <b>Gene</b>  | <b>Product Name</b>                                                           | <b>Base Mean</b> | <b>Fold Change</b> | <b>Adj. p-value</b> | <b>LYSZa2 Mean</b> | <b>LYSZa3 Mean</b> |
|--------------|-------------------------------------------------------------------------------|------------------|--------------------|---------------------|--------------------|--------------------|
| <i>algD</i>  | GDP-mannose 6-dehydrogenase AlgD                                              | 2956.90          | 138.79             | 2.47E-170           | 39.33              | 6375.00            |
| <i>algX</i>  | alginate biosynthesis protein AlgX                                            | 271.80           | 45.97              | 1.05E-75            | 10.67              | 585.67             |
| <i>algL</i>  | poly(beta-d-mannuronate) lyase precursor AlgL                                 | 283.61           | 44.85              | 1.98E-74            | 11.33              | 609.00             |
| <i>algJ</i>  | alginate o-acetyltransferase AlgJ                                             | 118.03           | 32.97              | 3.93E-33            | 6.33               | 248.67             |
| <i>algE</i>  | Alginate production outer membrane protein AlgE precursor                     | 254.48           | 25.19              | 1.11E-61            | 18.33              | 535.33             |
| <i>algA</i>  | phosphomannose isomerase / guanosine 5'-diphospho-D-mannose pyrophosphorylase | 481.88           | 21.52              | 9.22E-64            | 39.00              | 1000.67            |
| <i>algF</i>  | alginate o-acetyltransferase AlgF                                             | 152.00           | 18.68              | 7.50E-42            | 14.33              | 314.67             |
| <i>alg8</i>  | alginate biosynthesis protein Alg8                                            | 292.51           | 14.91              | 1.09E-59            | 34.67              | 599.33             |
| <i>alg44</i> | alginate biosynthesis protein Alg44                                           | 195.56           | 14.43              | 3.38E-61            | 23.67              | 403.00             |
| <i>algK</i>  | alginate biosynthetic protein AlgK precursor                                  | 135.65           | 10.35              | 6.37E-39            | 21.67              | 272.67             |
| <i>algI</i>  | alginate o-acetyltransferase AlgI                                             | 218.14           | 8.40               | 7.47E-47            | 43.00              | 427.33             |

|               |                                                |         |        |           |         |         |
|---------------|------------------------------------------------|---------|--------|-----------|---------|---------|
| <i>algG</i>   | alginate-c5-mannuronan-epimerase AlgG          | 356.62  | 4.45   | 4.15E-53  | 121.33  | 644.33  |
| <i>clpV1</i>  | ClpV1                                          | 5315.67 | -4.08  | 7.48E-33  | 7854.33 | 2309.33 |
| <b>PA3904</b> | PAAR4                                          | 1457.06 | -4.17  | 3.79E-33  | 2178.00 | 631.67  |
| <b>PA2702</b> | Tse2                                           | 280.90  | -4.35  | 2.50E-29  | 419.33  | 117.33  |
| <b>PA2774</b> | Tse4                                           | 296.61  | -4.37  | 4.85E-26  | 461.67  | 122.33  |
| <b>PA2775</b> | Tsi4                                           | 133.81  | -4.71  | 7.24E-19  | 212.67  | 52.33   |
| <i>vgrG1</i>  | VgrG1                                          | 2637.35 | -4.74  | 1.56E-50  | 3969.33 | 1016.67 |
| <b>PA0093</b> | Tse6                                           | 947.79  | -4.91  | 3.88E-46  | 1469.00 | 360.00  |
| <b>PA3905</b> | type VI effector chaperone for Tox-Rease, TecT | 1073.56 | -4.95  | 1.10E-53  | 1671.00 | 403.00  |
| <b>PA0082</b> | TssA1                                          | 1449.46 | -5.32  | 1.76E-55  | 2265.00 | 515.00  |
| <b>PA2703</b> | Tsi2                                           | 98.26   | -5.56  | 5.99E-24  | 156.67  | 33.00   |
| <b>PA0094</b> | EagT6                                          | 251.06  | -5.79  | 1.43E-38  | 401.67  | 82.00   |
| <b>PA3484</b> | Tse3                                           | 544.56  | -5.86  | 1.50E-54  | 869.33  | 174.33  |
| <i>stk1</i>   | Stk1                                           | 263.85  | -5.90  | 1.38E-56  | 423.00  | 84.67   |
| <b>PA5266</b> | VgrG6                                          | 396.48  | -6.81  | 6.50E-47  | 654.33  | 113.33  |
| <b>PA1667</b> | HsiJ2                                          | 678.54  | -6.99  | 2.41E-100 | 1119.67 | 188.67  |
| <b>PA1656</b> | HsiA2                                          | 3257.03 | -7.01  | 4.84E-80  | 5349.67 | 911.33  |
| <b>PA1662</b> | clpV2                                          | 2538.08 | -8.98  | 3.88E-108 | 4332.33 | 564.33  |
| <b>PA1661</b> | HsiH2                                          | 693.51  | -9.91  | 1.55E-110 | 1186.67 | 142.00  |
| <b>PA1666</b> | Lip2                                           | 340.97  | -10.48 | 2.48E-72  | 589.00  | 65.67   |
| <i>stp1</i>   | Stp1                                           | 327.95  | -10.61 | 1.67E-70  | 562.67  | 62.67   |
| <i>hcpA</i>   | secreted protein Hcp                           | 72.34   | -10.75 | 7.25E-26  | 125.33  | 13.67   |
| <b>PA1665</b> | Fha2                                           | 840.73  | -10.96 | 1.12E-108 | 1456.67 | 155.33  |
| <b>PA1660</b> | HsiG2                                          | 907.03  | -11.05 | 1.78E-125 | 1551.67 | 167.33  |
| <b>PA1669</b> | IcmF2                                          | 2052.74 | -11.08 | 6.20E-107 | 3547.33 | 375.67  |
| <i>hcpB</i>   | secreted protein Hcp                           | 204.27  | -11.30 | 8.81E-47  | 358.00  | 36.67   |
| <b>PA1668</b> | DotU2                                          | 487.58  | -11.30 | 1.39E-105 | 836.33  | 88.00   |
| <b>PA1663</b> | Sfa2                                           | 883.17  | -12.92 | 4.47E-74  | 1556.67 | 139.33  |
| <b>PA3334</b> | Acp3                                           | 236.04  | -13.79 | 1.82E-73  | 415.67  | 35.33   |
| <b>PA1657</b> | HsiB2                                          | 2539.11 | -14.39 | 1.32E-112 | 4445.00 | 366.00  |

|               |       |         |        |          |          |        |
|---------------|-------|---------|--------|----------|----------|--------|
| <b>PA1659</b> | HsiF2 | 480.65  | -17.06 | 4.25E-89 | 843.33   | 59.00  |
| <b>PA1658</b> | HsiC2 | 5746.91 | -17.11 | 4.82E-66 | 10179.00 | 695.67 |

547 **Table 3.** Selected DEGs in LYSZa6 comparing to LYSZa5 related to alginate biosynthesis and  
548 Type VI secretion system. Filtering criteria are fold change  $\geq 4$ , adjusted p-value  $< 0.05$  and base  
549 mean  $\geq 20$ . Full list of DEGs is included in Table S7.

## 550 **Figure legends**

551 **Figure 1.** Ring Plot and Phylogenetic tree of LYSZa2 and LYSZa5. **(A)** Ring plot of LYSZa2 and  
552 LYSZa5 comparing with other *P. aeruginosa* genomes. From the innermost, ring 1: GC content  
553 (black); ring 2: GC skew (purple/green); ring 3: LYSZa2 (dark red); ring 4: LYSZa5 (navy); ring  
554 5: PAO1 lab reference strain (violet); ring 6: PA14 clinical virulent strain (orange); ring 7:  
555 LESB58 hypervirulent clinical strain from CT patient (olive); ring 8: SCV20265 small colony  
556 variant strain (light green); ring 9: VRFPA04 multidrug resistant strain from keratitis  
557 patient (cyan); ring 10&11: GIs on LYSZa2 and LYSZa5 (black); ring 12&13: ARGs on LYSZa2  
558 and LYSZa5 (red); **(B)** phylogenetic tree constructed using LYSZa2 and LYSZa5 genomes and  
559 23 other *P. aeruginosa* genomes based on core genome alignment, LYSZa2 and LYSZa5 are  
560 highlighted in red.

561  
562 **Figure 2.** Heatmaps and PCoA plots of DEGs between the ancestry isolates and the progeny  
563 isolates. **(A)** heatmap of significant DEGs in LYSZa3 comparing to LYSZa2; **(B)** heatmap of  
564 significant DEGs in LYSZa6 comparing to LYSZa5; **(C)** PCoA plots of LYSZa3 group and  
565 LYSZa2 group based on DEGs using Bray Curtis dissimilarity; **(D)** PCoA plots of LYSZa6 group  
566 and LYSZa5 group based on DEGs using Bray Curtis dissimilarity.

567  
568 **Figure 3.** GO enrichment analysis and variation in gene abundance in each GO. **(A)** GO enriched

569 in LYSZa3 comparing to LYSZa2, bars towards right-hand side showing genes assigned to the  
570 functions were upregulated, bars towards left-hand side showing genes assigned to the functions  
571 were downregulated, up- and down-regulation are indicated in the legend as well, p-value < 0.05;  
572 **(B)** Variation in gene abundance involved in the enriched GO functions listed in A in LYSZa2  
573 and LYSZa3; **(C)** GO enriched in LYSZa6 comparing to LYSZa5, bars towards right-hand side  
574 showing genes assigned to the functions were upregulated, bars towards left-hand side showing  
575 genes assigned to the functions were downregulated, up- and down-regulation are indicated in  
576 the legend as well, p-value < 0.05; **(D)** Variation in gene abundance involved in the enriched GO  
577 functions listed in C in LYSZa5 and LYSZa6.

578

579 **Figure 4.** Schematic figure of HSI-I, HSI-II and HSI-III gene clusters. Genes downregulated in  
580 LYSZa3 are denoted by purple crosses; genes downregulated in LYSZa6 are denoted by red  
581 triangles. Gene name was obtained from Pseudomonas Genome Database [49].

582

583 **Figure 5.** Phenotypic analysis. **(A)** Colony morphologies of the isolates; **(B)** Biofilm  
584 quantification tests by crystal violet staining, \*\*: p-value < 0.05; Upper panel: biofilm  
585 quantification test of LYSZa2 and LYSZa3, lower panel: biofilm quantification test of LYSZa5  
586 and LYSZa6.

587

588 **Figure 6.** Bacterial competition assay between the isolates and *E. coli*. Blue pigment intensity  
589 indicates the survival of *E. coli*. **(A)** Upper panel: competition between LYSZa2 and *E. coli*;  
590 lower panel: competition between LYSZa3 and *E. coli*, number in each section denotes the  
591 dilution factor, ranged from  $10^0$  to  $10^{-3}$ ; **(B)** Upper panel: competition between LYSZa5 and *E.*  
592 *coli*; lower panel: competition between LYSZa6 and *E. coli*, number in each section denotes the

593 dilution factor, ranged from  $10^0$  to  $10^{-3}$ ; (C) Counts of *E. coli* CFU left in each competition, \*\*:

594 p-value<0.05.

595

596

597 **Figure 7.** Macrophage cytotoxicity assay of the ancestry isolates and the progeny isolates.

598 Killing of macrophage is illustrated by the percent of LDH released, \*\*: p-value<0.05.

599

600

A

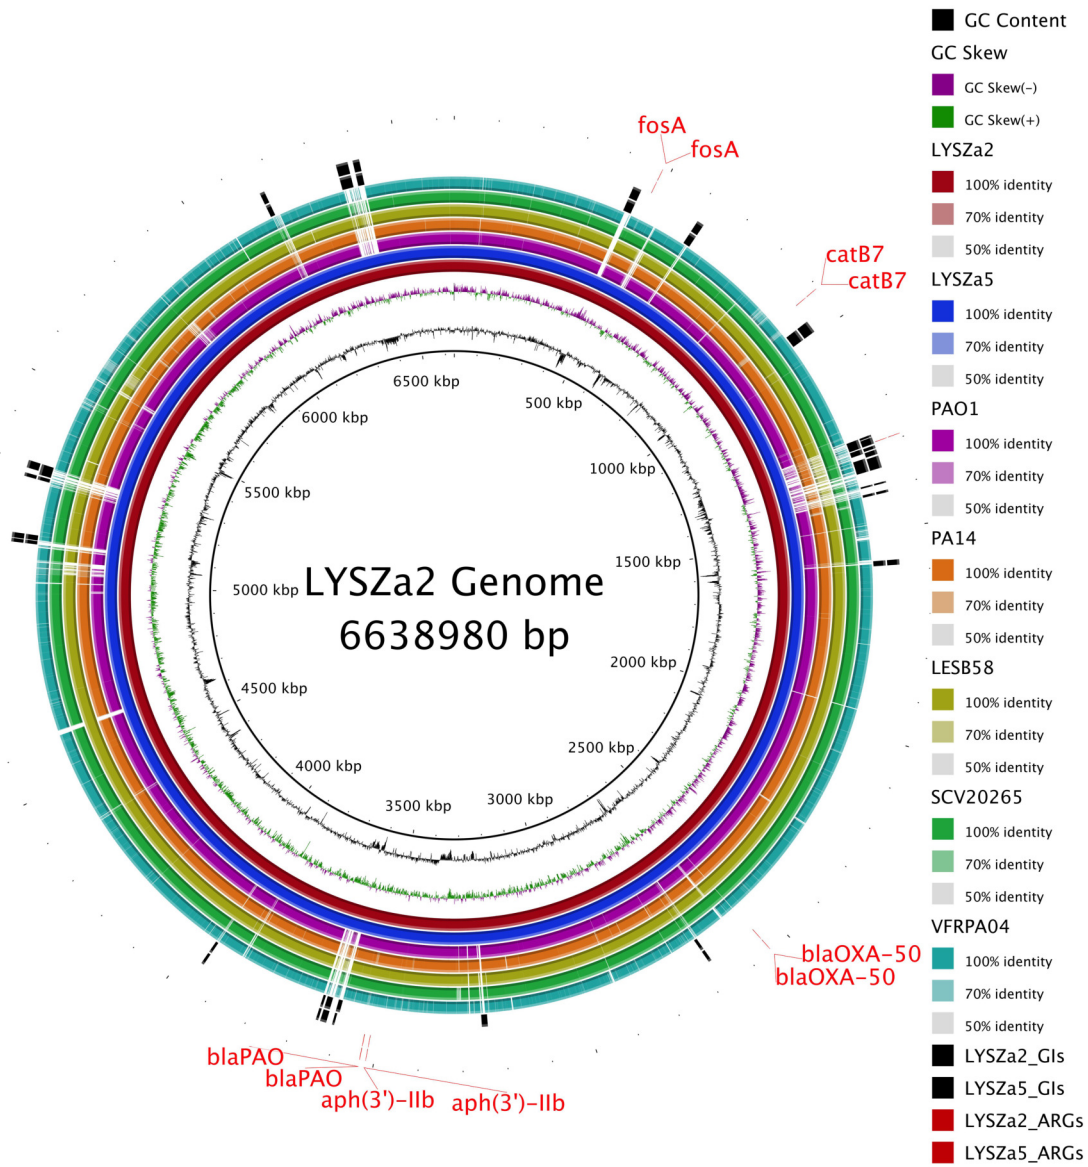

B

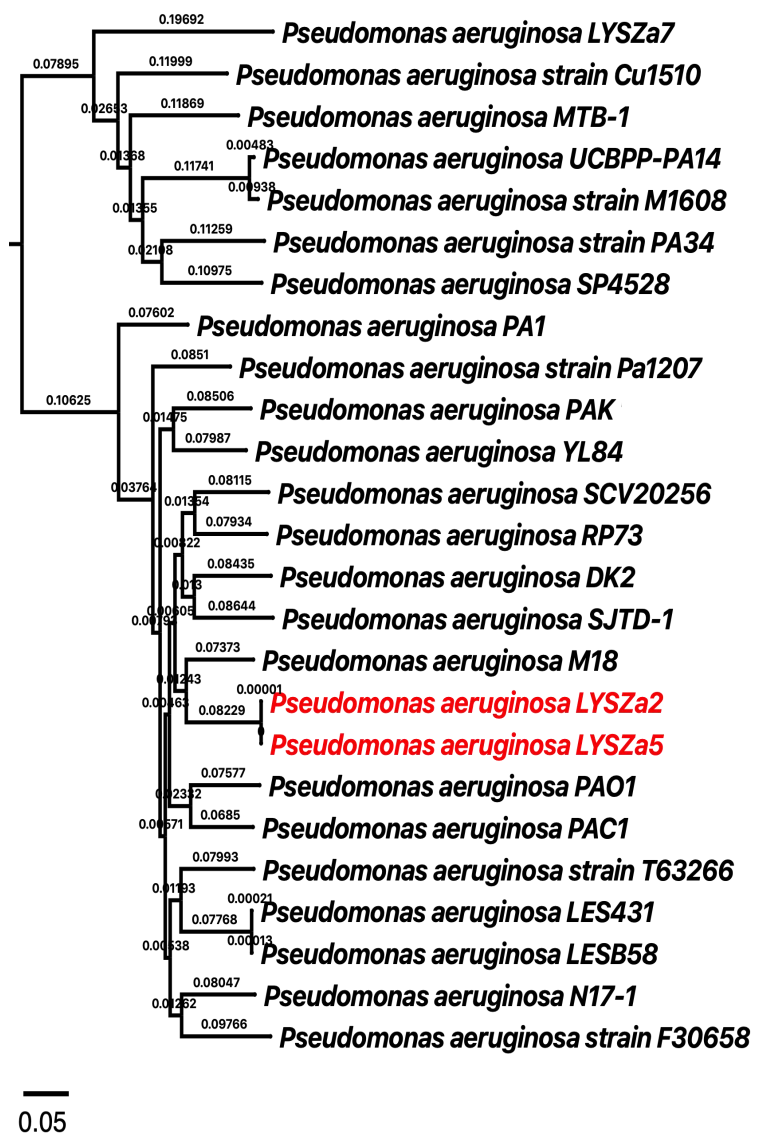

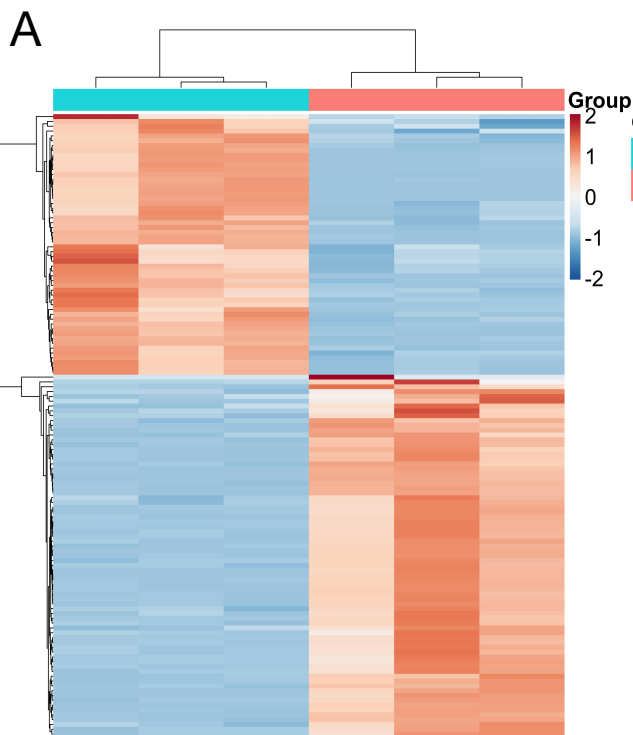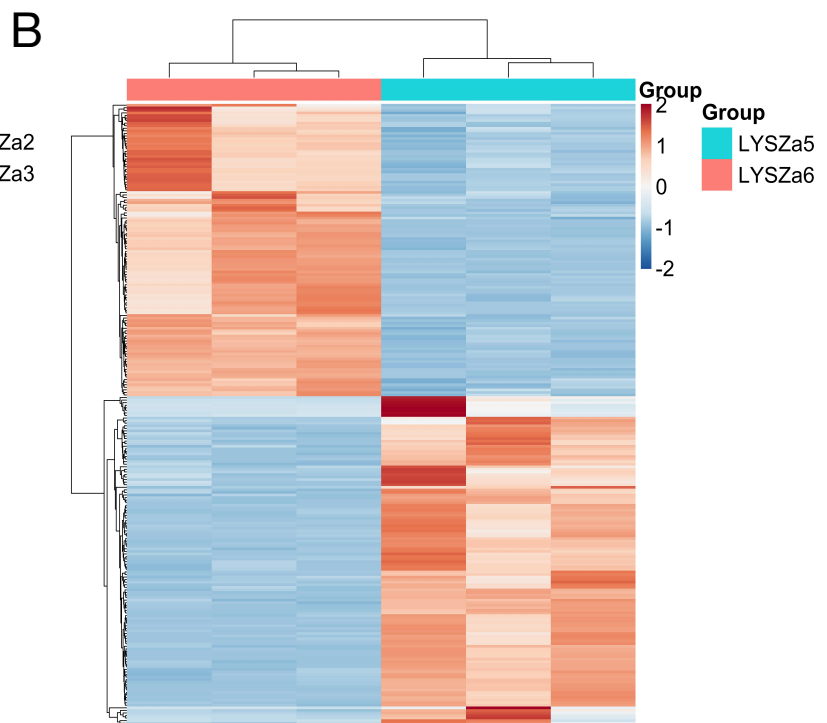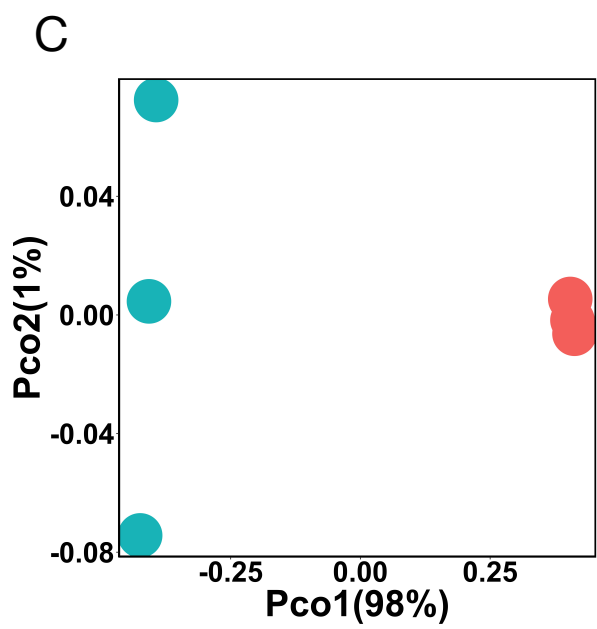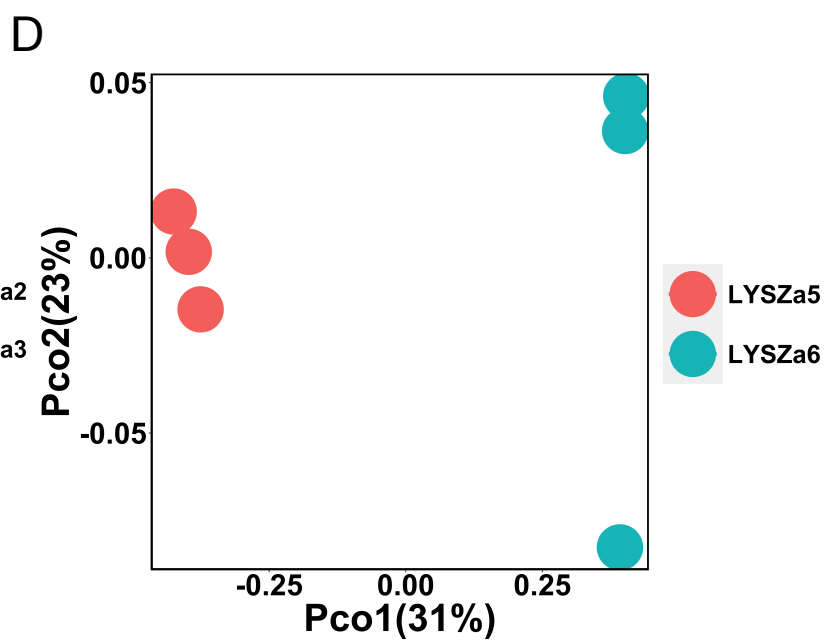

A

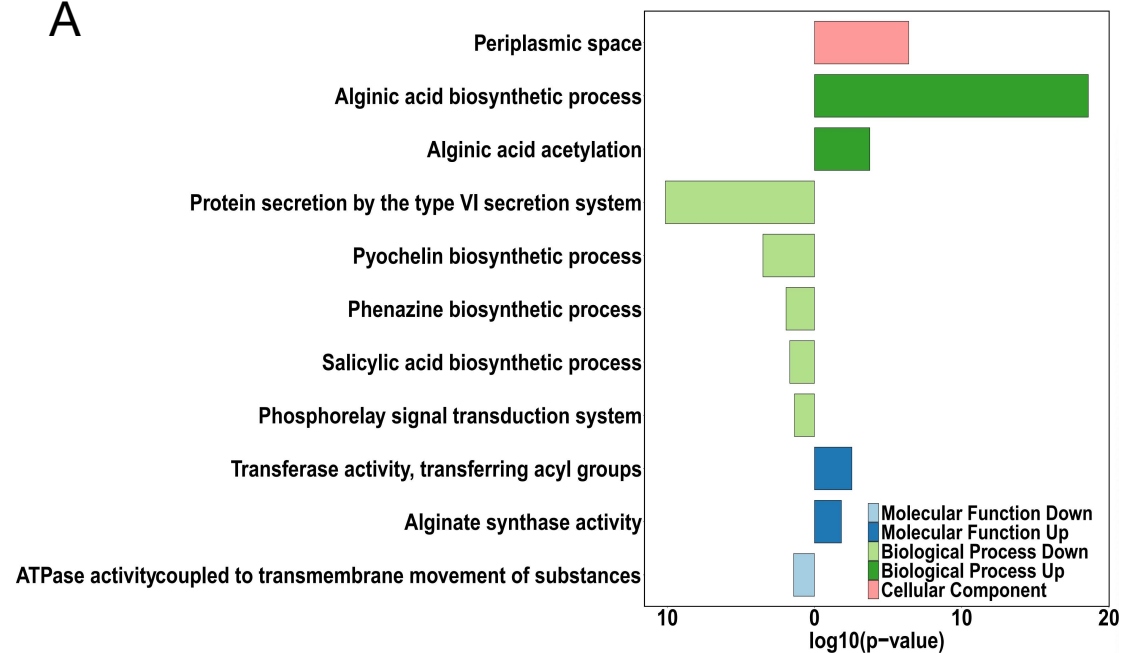

B

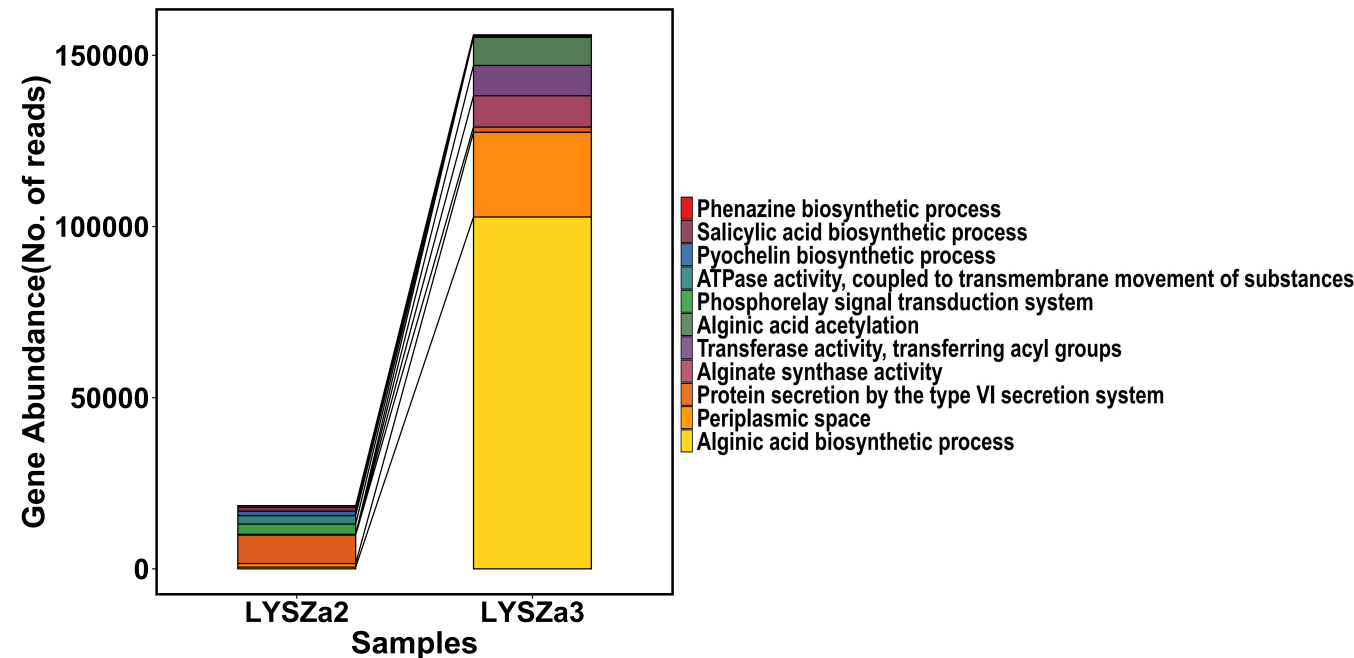

C

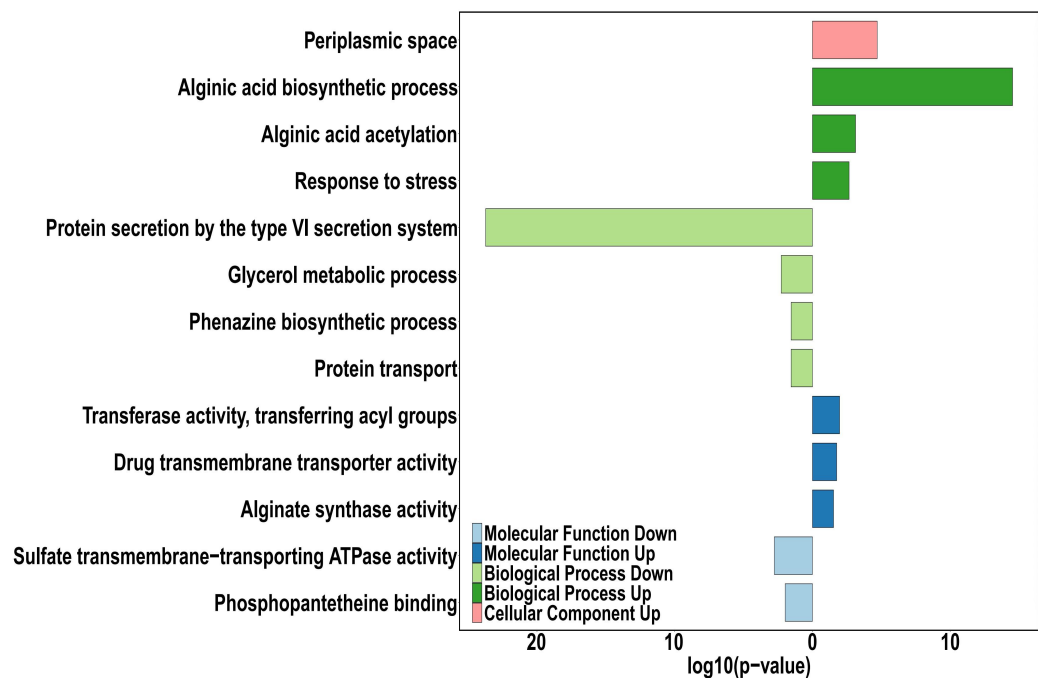

D

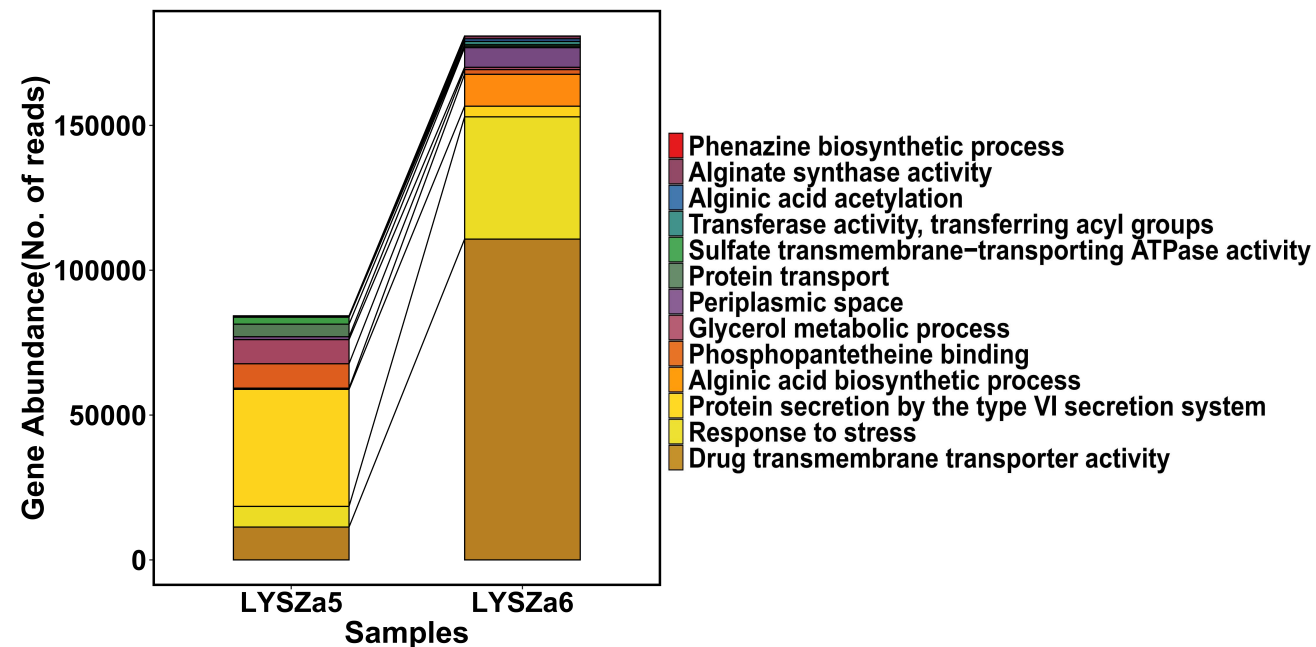



### HSI-I

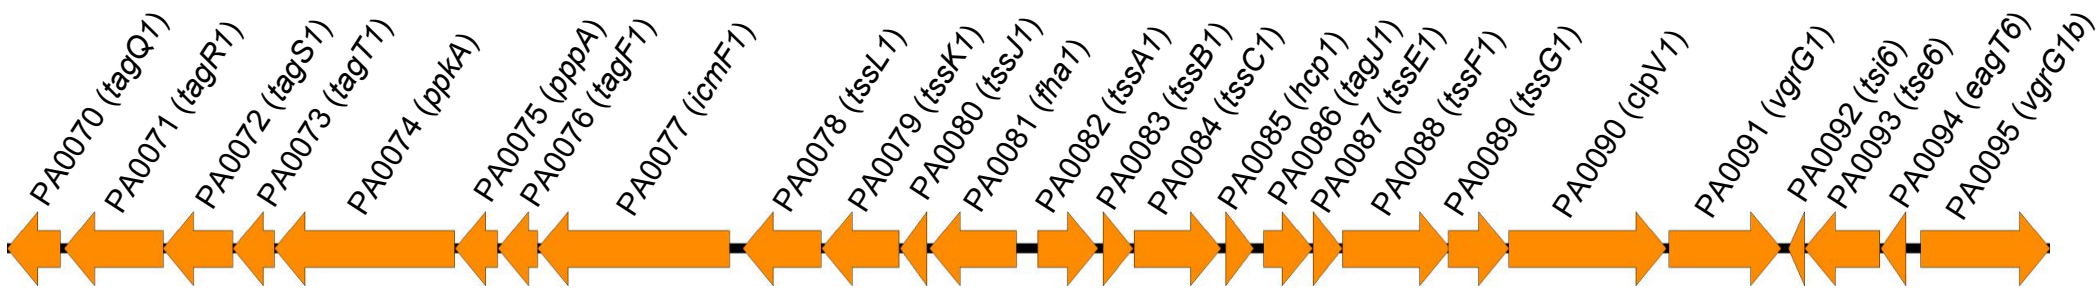

### HSI-II

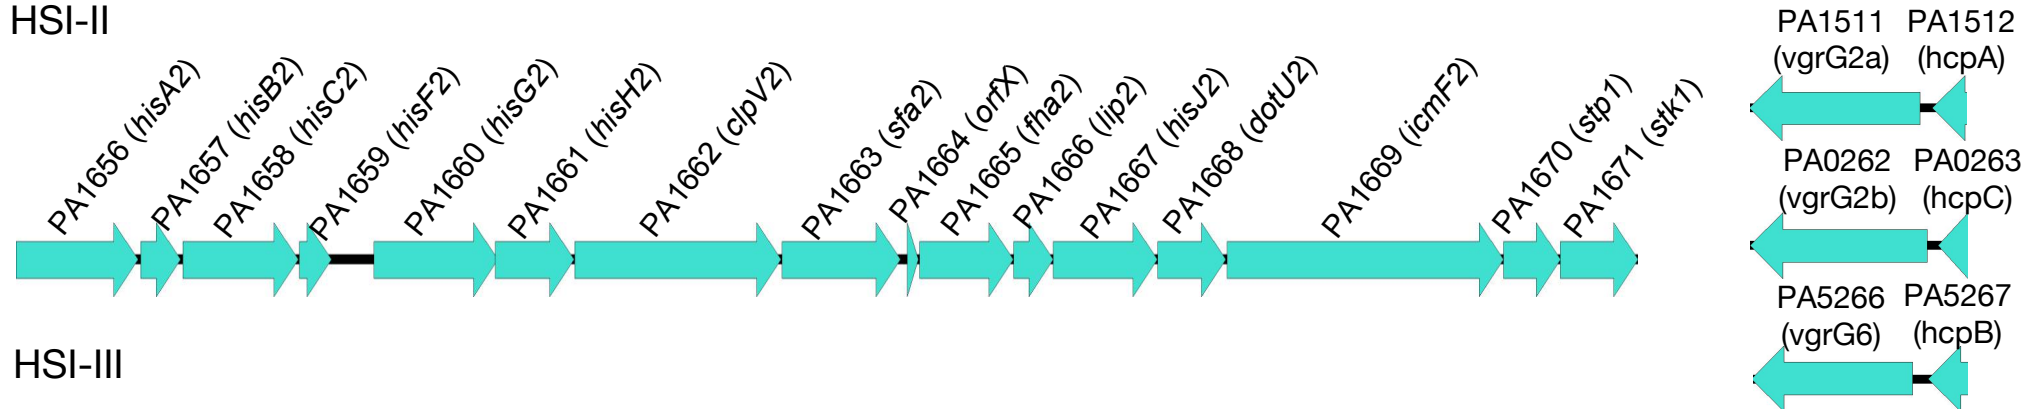

### HSI-III

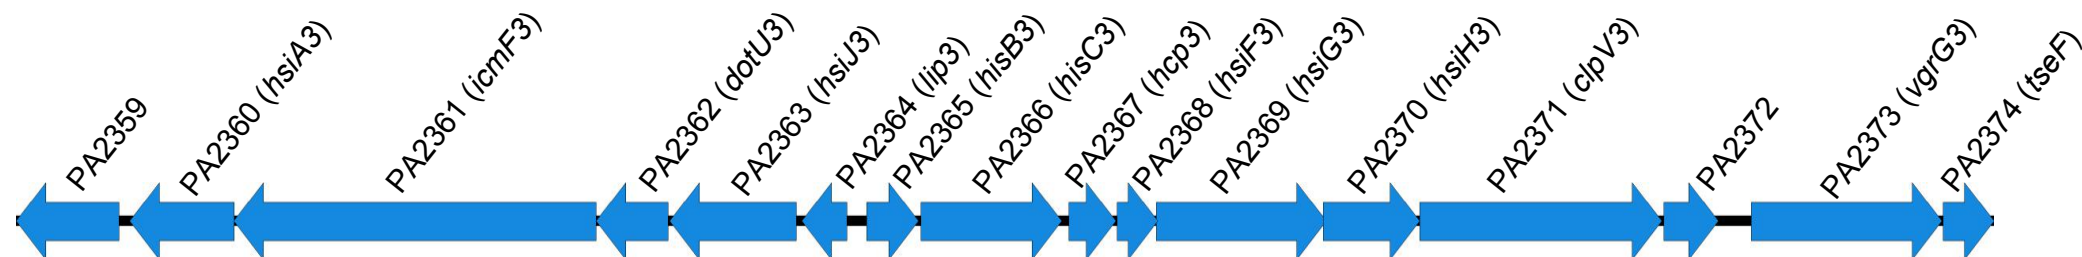

A

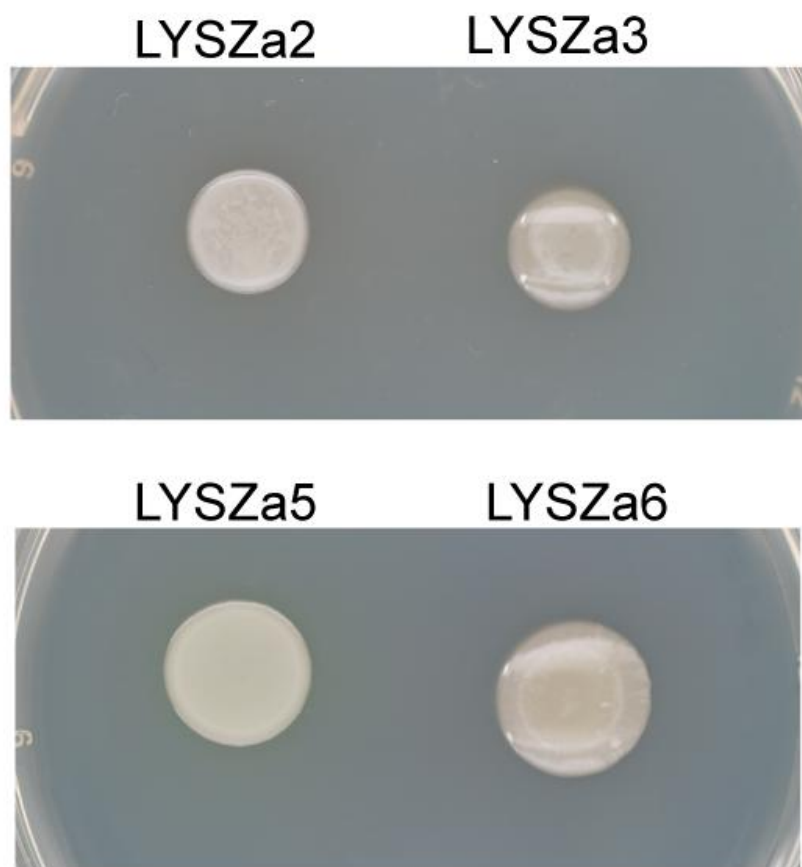

B

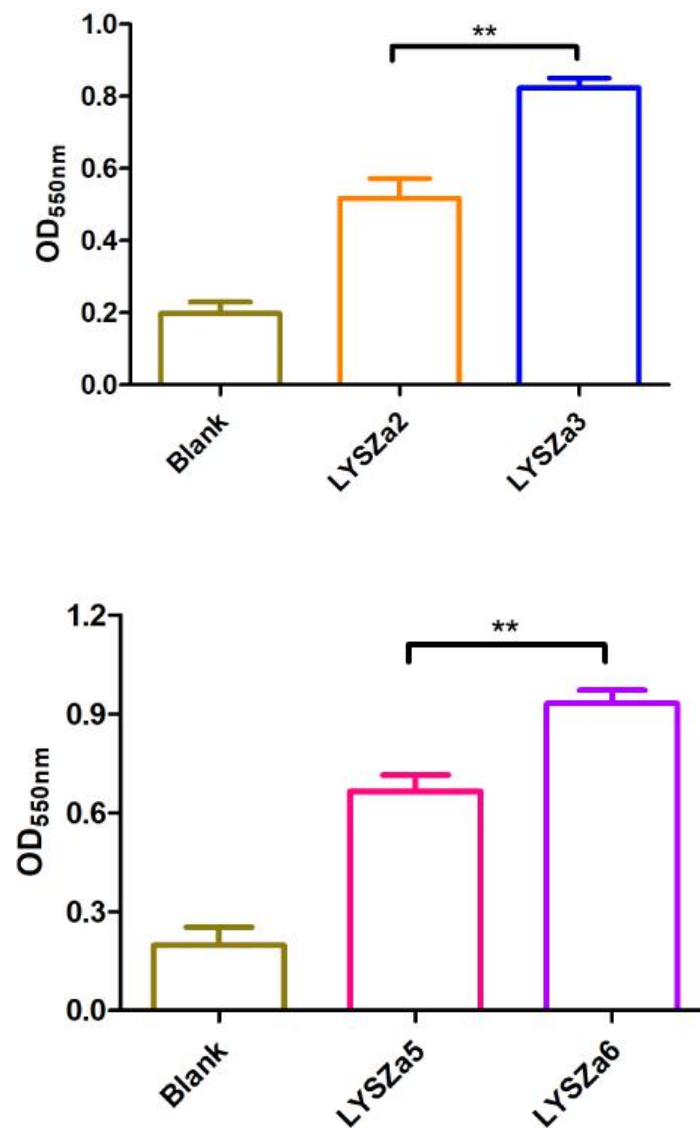

A LYSZa2 + E.coli

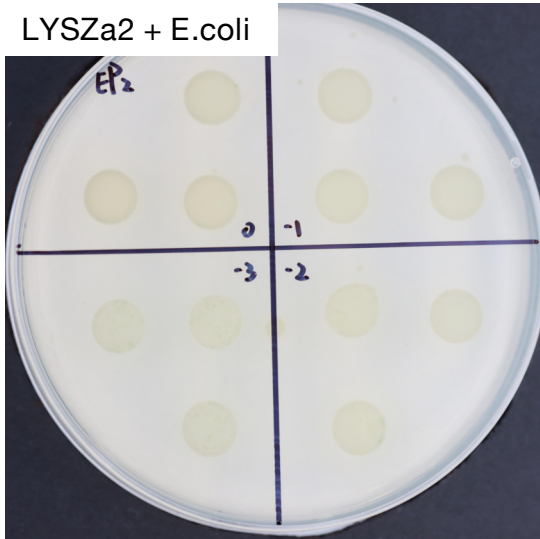

B LYSZa5 + E.coli

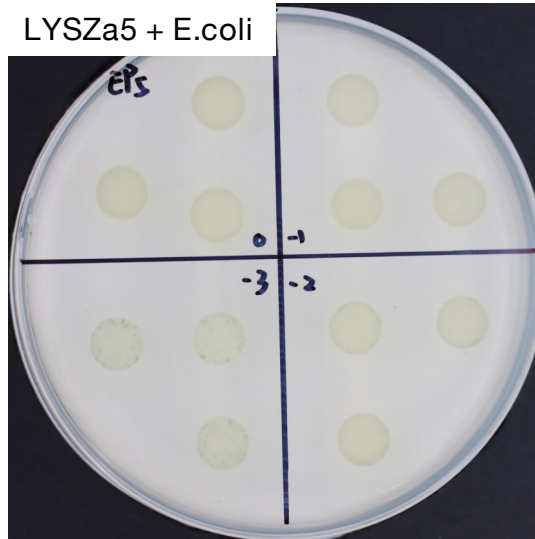

LYSZa3 + E.coli

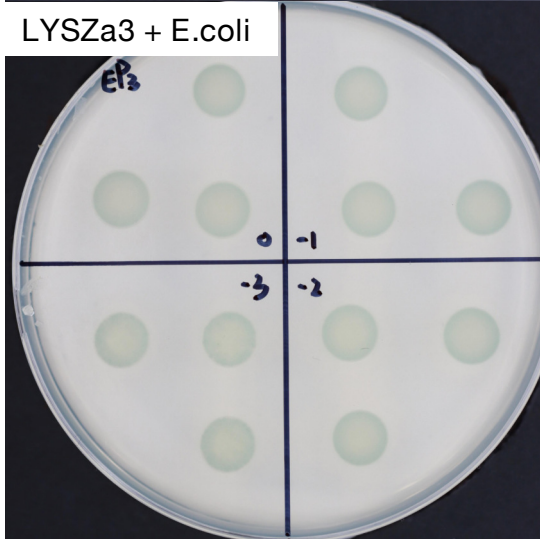

LYSZa6 + E.coli

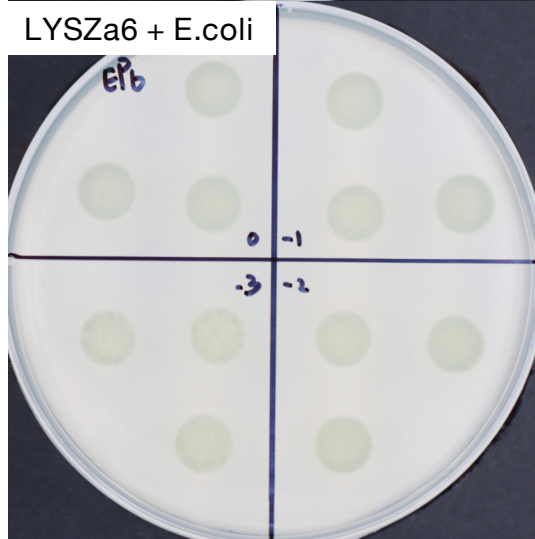

C

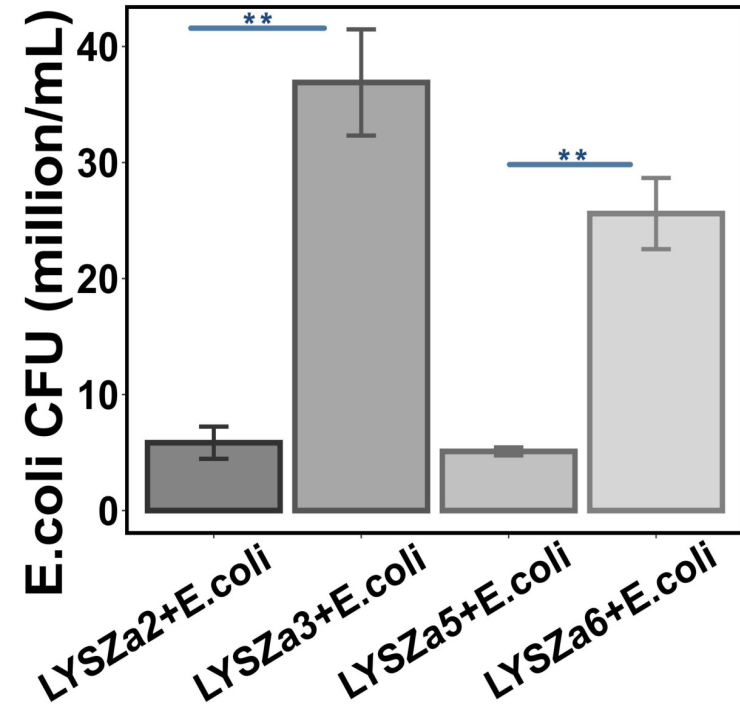

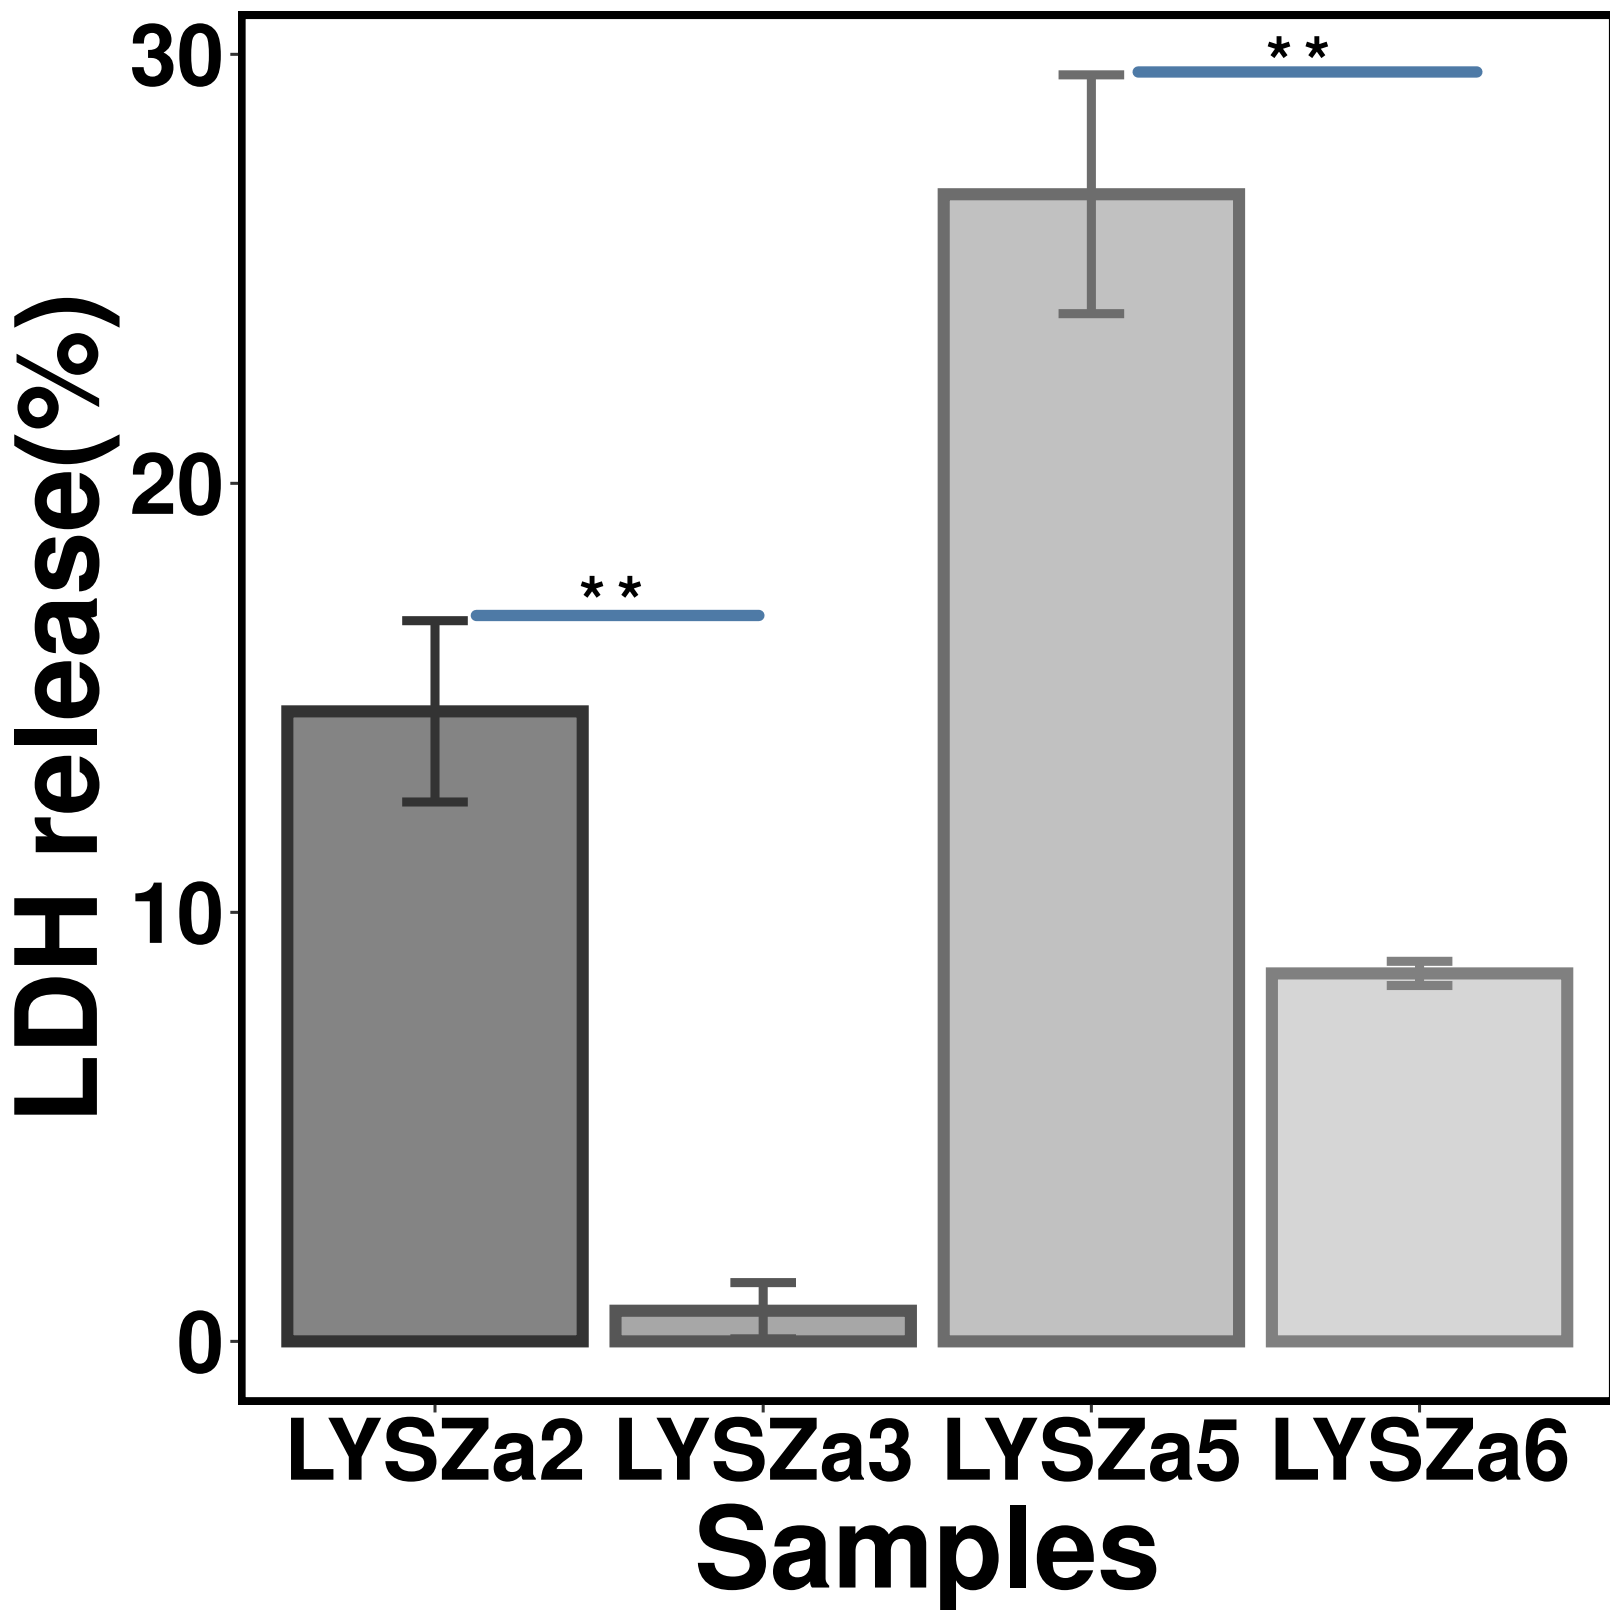

Source: https://biorxiv.org/content/10.1101/2021.04.09.439260v1.full.pdf
